# Supplementary material for: Oxford consensus on primary cam morphology and femoroacetabular impingement syndrome: part 1—definitions, terminology, taxonomy and imaging outcomes
Source: PubMed Central journal article supplement — Br J Sports Med. 2022 Dec 6;57(6):325–41. doi: 10.1136/bjsports-2022-106085 (PMC9985727; doi:10.1136/bjsports-2022-106085), 2022-12-06
Supplement: bjsports-2022-106085supp003.pdf [file bjsports-2022-106085supp003.pdf]

|                                                                                                                                                             |                                                                                                                                                                                                                       |                                                                                     |
|-------------------------------------------------------------------------------------------------------------------------------------------------------------|-----------------------------------------------------------------------------------------------------------------------------------------------------------------------------------------------------------------------|-------------------------------------------------------------------------------------|
| <p>Nuffield Department of Primary Care Health Sciences<br/>University of Oxford<br/>Radcliffe Primary Care Building<br/>Woodstock Rd<br/>Oxford OX2 6GG</p> |                                                    |  |
| <p><b>Principal Investigator:</b><br/>Prof Trisha Greenhalgh</p>                                                                                            | <p><b>Primary researcher:</b><br/>Dr Paul Dijkstra (DPhil Evidence-Based Health Care student)<br/>Oxford University telephone number: 01865 617835<br/>Oxford University e-mail: hendrik.dijkstra@conted.ox.ac.uk</p> |                                                                                     |

## Primary Cam Morphology Delphi Study Steering Committee

### Terms of Reference

|                                                      |                                                                                                                                                                                                                                                                                                                                                                                                                                                                                                                                                                                                                                                                                                                                                                                                                                                                                                                                                                                                                                                                                                                                                                                                                                                              |
|------------------------------------------------------|--------------------------------------------------------------------------------------------------------------------------------------------------------------------------------------------------------------------------------------------------------------------------------------------------------------------------------------------------------------------------------------------------------------------------------------------------------------------------------------------------------------------------------------------------------------------------------------------------------------------------------------------------------------------------------------------------------------------------------------------------------------------------------------------------------------------------------------------------------------------------------------------------------------------------------------------------------------------------------------------------------------------------------------------------------------------------------------------------------------------------------------------------------------------------------------------------------------------------------------------------------------|
| <b>Title</b>                                         | An international Delphi study on a more rigorous, inclusive, and evidence-based approach to research on primary cam morphology                                                                                                                                                                                                                                                                                                                                                                                                                                                                                                                                                                                                                                                                                                                                                                                                                                                                                                                                                                                                                                                                                                                               |
| <b>Aim</b>                                           | To inform a more rigorous, inclusive, and evidence-based approach to research on primary cam morphology in athletes                                                                                                                                                                                                                                                                                                                                                                                                                                                                                                                                                                                                                                                                                                                                                                                                                                                                                                                                                                                                                                                                                                                                          |
| <b>Objectives</b>                                    | <p>The study objectives; to:</p> <ol style="list-style-type: none"> <li>(1) ascertain level of agreement between experts on primary cam morphology taxonomy, terminology, and definitions, (including imaging outcome measures),</li> <li>(2) work towards agreement on a set of research priorities on conditions affecting the young person's hip (focussing on primary cam morphology and its consequences in athletes), and</li> <li>(3) inform the design of a webinar and symposium to engage stakeholders, disseminate latest evidence, and stimulate debate</li> </ol>                                                                                                                                                                                                                                                                                                                                                                                                                                                                                                                                                                                                                                                                               |
| <b>Steering Committee Chairperson</b>                | Professor Trisha Greenhalgh                                                                                                                                                                                                                                                                                                                                                                                                                                                                                                                                                                                                                                                                                                                                                                                                                                                                                                                                                                                                                                                                                                                                                                                                                                  |
| <b>Steering Committee Members &amp; Affiliations</b> | <p>H Paul Dijkstra<sup>1 2</sup>, Sean Mc Auliffe<sup>3</sup>, Andreas Serner<sup>4</sup>, Andrea Mosler<sup>5</sup>, Joanne Kemp<sup>5</sup>, Clare L Ardern<sup>5 6</sup>, Amy Price<sup>7</sup>, Sally Hopewell<sup>8</sup>, Jason Oke<sup>9</sup>, Karim M Khan<sup>10</sup>, Sion Glyn-Jones<sup>11</sup>, Mike Clarke<sup>12</sup>, Trisha Greenhalgh<sup>13</sup></p> <p><b>Steering Committee Affiliations</b></p> <p><sup>1</sup> Department of Medical Education, Aspetar, Qatar Orthopaedic and Sports Medicine Hospital, Doha, Qatar</p> <p><sup>2</sup> Department for Continuing Education, University of Oxford, Oxford, UK</p> <p><sup>3</sup> Department of Physical Therapy &amp; Rehabilitation Science, College of Health Sciences, Qatar University, Doha, Qatar</p> <p><sup>4</sup> Aspetar Sports Groin Pain Centre, Aspetar Orthopaedic and Sports Medicine Hospital, Doha, Qatar</p> <p><sup>5</sup> La Trobe Sport and Exercise Medicine Research Centre, School of Allied Health, Human Services and Sport, La Trobe University, Melbourne, Victoria, Australia</p> <p><sup>6</sup> Musculoskeletal and Sports Injury Epidemiology Centre, Department of Health Promotion Science, Sophiahemmen University, Stockholm, Sweden</p> |

|                                                                                                                                                             |                                                                                                                                                                                                                       |                                                                                     |
|-------------------------------------------------------------------------------------------------------------------------------------------------------------|-----------------------------------------------------------------------------------------------------------------------------------------------------------------------------------------------------------------------|-------------------------------------------------------------------------------------|
| <p>Nuffield Department of Primary Care Health Sciences<br/>University of Oxford<br/>Radcliffe Primary Care Building<br/>Woodstock Rd<br/>Oxford OX2 6GG</p> |                                                    |  |
| <p><b>Principal Investigator:</b><br/>Prof Trisha Greenhalgh</p>                                                                                            | <p><b>Primary researcher:</b><br/>Dr Paul Dijkstra (DPhil Evidence-Based Health Care student)<br/>Oxford University telephone number: 01865 617835<br/>Oxford University e-mail: hendrik.dijkstra@conted.ox.ac.uk</p> |                                                                                     |

|  |                                                                                                                                                                                                                                                                                                                                                                                                                                                                                                                                                                                                                                                                                                                                                                                                                                                                                    |
|--|------------------------------------------------------------------------------------------------------------------------------------------------------------------------------------------------------------------------------------------------------------------------------------------------------------------------------------------------------------------------------------------------------------------------------------------------------------------------------------------------------------------------------------------------------------------------------------------------------------------------------------------------------------------------------------------------------------------------------------------------------------------------------------------------------------------------------------------------------------------------------------|
|  | <p><sup>7</sup> Stanford Anesthesia, Informatics and Media Lab, Stanford School of Medicine, Department of Anesthesia, Stanford University<br/> <sup>8</sup> Centre for Statistics in Medicine, Oxford Clinical Trials Research Unit, Medical Sciences Division, University of Oxford<br/> <sup>9</sup> NIHR Oxford Biomedical Research Centre, Oxford University Hospitals NHS Foundation Trust<br/> <sup>10</sup> Department of Family Practice and School of Kinesiology, University of British Columbia, Vancouver, Canada<br/> <sup>11</sup> Nuffield Department of Orthopaedics, Rheumatology and Musculoskeletal Sciences, University of Oxford<br/> <sup>12</sup> Northern Ireland Methodology Hub, Centre for Public Health, Queen's University Belfast, UK<br/> <sup>13</sup> Nuffield Department of Primary Care Health Sciences, University of Oxford, Oxford, UK;</p> |
|--|------------------------------------------------------------------------------------------------------------------------------------------------------------------------------------------------------------------------------------------------------------------------------------------------------------------------------------------------------------------------------------------------------------------------------------------------------------------------------------------------------------------------------------------------------------------------------------------------------------------------------------------------------------------------------------------------------------------------------------------------------------------------------------------------------------------------------------------------------------------------------------|

### Terms of Reference

The Primary Cam Morphology Delphi Study Steering Committee will:

1. approve and publish the study protocol
2. deliver expertise to the study group
3. provide oversight to all elements of the study towards its overall objectives
4. review study progress at regular intervals
5. ensure compliance with ethical research standards
6. provide oversight to the planning and conduct of the final synchronous (online/in-person) discussion of the Delphi results with careful attention to dissent and ambiguity
7. assist in disseminating findings from the study across their wider networks

Approved: 14<sup>th</sup> April 2021

Mr Paul Blazey (Centre for Hip Health and Mobility, University of British Columbia, Vancouver, Canada; Department of Physical Therapy, Faculty of Medicine, University of British Columbia, Vancouver, Canada) replaced Professor Sally Hopewell.
