# Supplementary material for: Oxford consensus on primary cam morphology and femoroacetabular impingement syndrome: part 1—definitions, terminology, taxonomy and imaging outcomes
Source: PubMed Central journal article supplement — Br J Sports Med. 2022 Dec 6;57(6):325–41. doi: 10.1136/bjsports-2022-106085 (PMC9985727; doi:10.1136/bjsports-2022-106085), 2022-12-06
Supplement: bjsports-2022-106085supp007.pdf [file bjsports-2022-106085supp007.pdf]

## SUPPLEMENTARY FILE 7

### Primary cam morphology Delphi study – Dissent analysis Delphi domains 1 to 4

Although the main aim of the Delphi method is to structure a group communication process that might lead to consensus, we were also interested in panel dissent. To explore possible dissent, we applied *dissent analyses* including outlier analysis, bipolarity analysis, and stakeholder group analysis. In addition we performed a thematic analysis of panellists' comments, including tension and dissent, as described. [1,2]

#### Table of Contents

|                                                                                                                                                                                                                |    |
|----------------------------------------------------------------------------------------------------------------------------------------------------------------------------------------------------------------|----|
| <b>Outlier analysis</b> .....                                                                                                                                                                                  | 4  |
| <b>Definitions – Delphi domain 1</b> .....                                                                                                                                                                     | 4  |
| <b>Figure SF7-1</b> Outliers for statements 1 to 12 (OS: Orthopaedic Surgeon; PPI: Patient & Public Involvement group member; MD: Physician; PT: Physical Therapist; Rad: Radiologist; Res: Researcher) .....  | 4  |
| <b>Terminology – Delphi domain 2</b> .....                                                                                                                                                                     | 5  |
| <b>Figure SF7-2</b> Outliers for statements 13 to 31 (OS: Orthopaedic Surgeon; PPI: Patient & Public Involvement group member; MD: Physician; PT: Physical Therapist; Rad: Radiologist; Res: Researcher) ..... | 5  |
| <b>Taxonomy – Delphi domain 3</b> .....                                                                                                                                                                        | 6  |
| <b>Figure SF7-3</b> Outliers for statements 32 to 35 (OS: Orthopaedic Surgeon; PPI: Patient & Public Involvement group member; MD: Physician; PT: Physical Therapist; Rad: Radiologist; Res: Researcher) ..... | 6  |
| <b>Imaging outcomes – Delphi domain 4</b> .....                                                                                                                                                                | 7  |
| <b>Figure SF7-4</b> Outliers for statements 32 to 35 (OS: Orthopaedic Surgeon; PPI: Patient & Public Involvement group member; MD: Physician; PT: Physical Therapist; Rad: Radiologist; Res: Researcher) ..... | 7  |
| <b>Bipolarity analysis</b> .....                                                                                                                                                                               | 8  |
| <b>Definitions – Delphi domain 1</b> .....                                                                                                                                                                     | 8  |
| <b>Figure SF7-5</b> Histograms of Likert Scale score frequencies for statements 1 to 12 .....                                                                                                                  | 9  |
| <b>Terminology – Delphi domain 2</b> .....                                                                                                                                                                     | 10 |
| <b>Figure SF7-6</b> Histograms of Likert Scale score frequencies for statements 13 to 31 .....                                                                                                                 | 13 |
| <b>Taxonomy – Delphi domain 3</b> .....                                                                                                                                                                        | 14 |
| <b>Figure SF7-7</b> Histograms of Likert Scale score frequencies for statements 32 to 35 .....                                                                                                                 | 14 |
| <b>Imaging outcomes – Delphi domain 4</b> .....                                                                                                                                                                | 15 |
| <b>Figure SF7-8</b> Histograms of Likert Scale score frequencies for statements 36 to 47 .....                                                                                                                 | 16 |
| <b>Stakeholder Group analysis</b> .....                                                                                                                                                                        | 17 |
| <b>Definitions – Delphi domain 1</b> .....                                                                                                                                                                     | 17 |

|                                                                                                                                         |    |
|-----------------------------------------------------------------------------------------------------------------------------------------|----|
| <b>Table SF7-1</b> Kruskal-Wallis test to compare Orthopaedic Surgeons vs other stakeholder groups (p-values) .....                     | 17 |
| <b>Table SF7-2</b> Kruskal-Wallis test to compare Patient & Public Involvement Group (PPI) vs other stakeholder groups (p-values) ..... | 19 |
| <b>Table SF7-3</b> Kruskal-Wallis test to compare Physical Therapists vs other stakeholder groups (p-values) .....                      | 22 |
| <b>Table SF7-4</b> Kruskal-Wallis test to compare Physicians vs other stakeholder groups (p-values) 24                                  |    |
| <b>Table SF7-5</b> Kruskal-Wallis test to compare Radiologists vs other stakeholder groups (p-values) .....                             | 26 |
| <b>Table SF7-6</b> Kruskal-Wallis test to compare Researchers vs other stakeholder groups (p-values) .....                              | 28 |
| <b>Terminology – Delphi domain 2</b> .....                                                                                              | 31 |
| <b>Table SF7-7</b> Kruskal-Wallis test to compare Orthopaedic Surgeons vs other stakeholder groups (p-values) .....                     | 31 |
| <b>Table SF7-8</b> Kruskal-Wallis test to compare Patient & Public Involvement Group (PPI) vs other stakeholder groups (p-values) ..... | 34 |
| <b>Table SF7-9</b> Kruskal-Wallis test to compare Physical Therapists vs other stakeholder groups.. 37                                  |    |
| <b>Table SF7-10</b> Kruskal-Wallis test to compare Physicians vs other stakeholder groups (p-values) .....                              | 40 |
| <b>Table SF7-11</b> Kruskal-Wallis test to compare Radiologists vs other stakeholder groups (p-values).....                             | 43 |
| <b>Table SF7-12</b> Kruskal-Wallis test to compare Researchers vs other stakeholder groups (p-values).....                              | 46 |
| <b>Taxonomy - Delphi domain 3</b> .....                                                                                                 | 50 |
| <b>Table SF7-13</b> Kruskal-Wallis test to compare Orthopaedic Surgeons vs other stakeholder groups (p-values) .....                    | 50 |
| <b>Table SF7-14</b> Kruskal Wallis test to compare Patient & Public Involvement Group (PPI) vs other stakeholder groups .....           | 50 |
| <b>Table SF7-15</b> Kruskal-Wallis test to compare Physical Therapists vs other stakeholder groups (p-values) .....                     | 51 |
| <b>Table SF7-16</b> Kruskal-Wallis test to compare Physicians vs other stakeholder groups (p-values) .....                              | 52 |
| <b>Table SF7-17</b> Kruskal-Wallis test to compare Radiologists vs other stakeholder groups (p-values).....                             | 52 |
| <b>Table SF7-18</b> Kruskal-Wallis test to compare Researchers vs other stakeholder groups (p-values).....                              | 53 |
| <b>Imaging outcomes – Delphi domain 4</b> .....                                                                                         | 54 |
| <b>Table SF7-19</b> Kruskal-Wallis test to compare Orthopaedic Surgeons vs other stakeholder groups (p-values) .....                    | 54 |

|                                                                                                                               |    |
|-------------------------------------------------------------------------------------------------------------------------------|----|
| <b>Table SF7-20</b> Kruskal-Wallis test to compare Patient & Public Involvement Group (PPI) vs other stakeholder groups ..... | 57 |
| <b>Table SF7-21</b> Kruskal-Wallis test to compare Physical Therapists vs other stakeholder groups (-values) .....            | 60 |
| <b>Table SF7-22</b> Kruskal-Wallis test to compare Physicians vs other stakeholder groups (p-values) .....                    | 63 |
| <b>Table SF7-23</b> Kruskal-Wallis test to compare Radiologists vs other stakeholder groups (p-values) .....                  | 66 |
| <b>Table SF7-24</b> Kruskal-Wallis test to compare Researchers vs other stakeholder groups (p-values) .....                   | 70 |
| <b>References</b> .....                                                                                                       | 74 |

## Outlier analysis

Outliers can have a substantial effect on variables (e.g., Interquartile range), and statistical consensus. The existence of outliers is therefore an important potential explanation for dissent. We identified low outliers as data points that fall more than 1.5 times the Interquartile range below the first quartile, and high outliers as data points that fall more than 1.5 times the Interquartile range above the third quartile. In addition, we visually inspected histograms of Round 2 stakeholder group scoring for outliers. We re-analysed consensus after eliminating outliers for all statements with marginal non-consensus to test if these had an impact on the group's consensus.

### Definitions – Delphi domain 1

Outliers for ten of twelve definition statements in round 2, had no statistical effect on group consensus or non-consensus. (Figure 1) None of the outliers provided qualitative comments. One physical therapist chose “Unable to score” for most of the definition statements in round 1 and 2 as they *‘did not agree that the concept of primary and secondary CAM is commonly agreed and established’*.

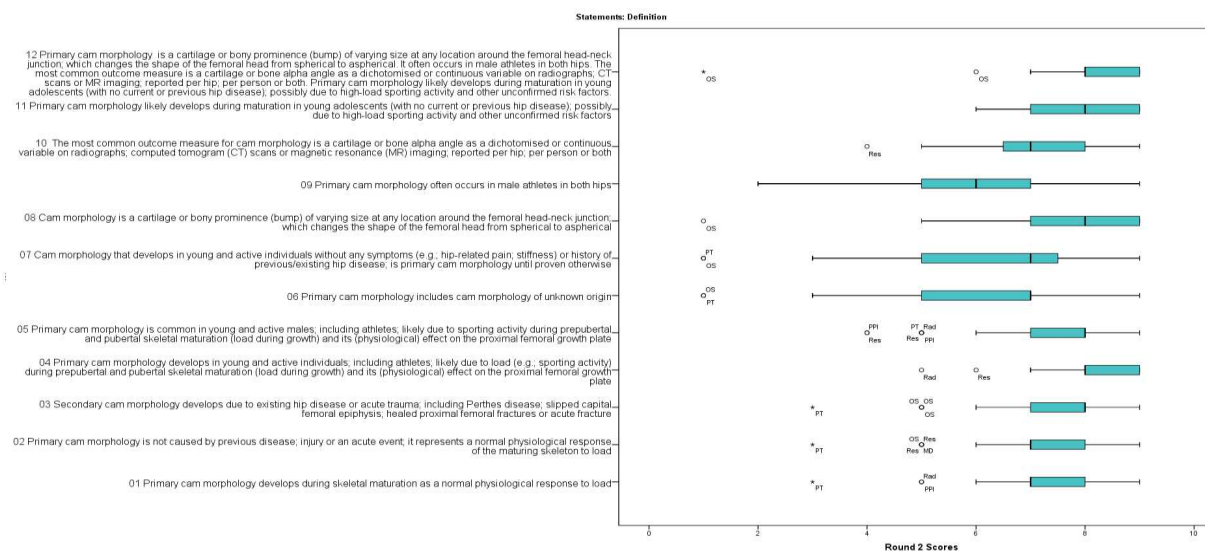

**Figure SF7-1** Outliers for statements 1 to 12 (OS: Orthopaedic Surgeon; PPI: Patient & Public Involvement group member; MD: Physician; PT: Physical Therapist; Rad: Radiologist; Res: Researcher)

## Terminology – Delphi domain 2

Outliers for 16 of the 19 terminology statements in round 2, had no statistical effect on group consensus or non-consensus. (Figure 2) The orthopaedic surgeon outlier for statements 13 and 26 did not agree that primary cam morphology refers to a bump “at any location” around the femoral head-neck junction. One physician chose “Unable to score” for most of the terminology statements in round 1 as they misinterpreted the statement wording. Feedback after round 1 clarified the misunderstanding.

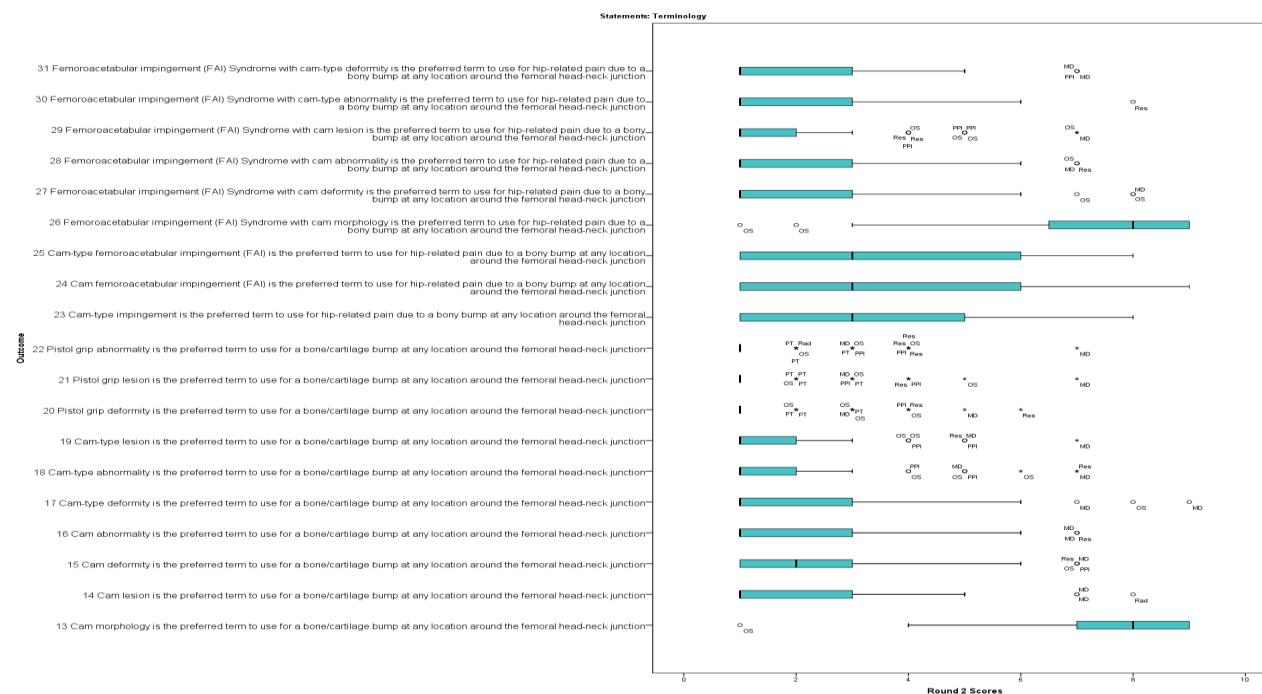

**Figure SF7-2** Outliers for statements 13 to 31 (OS: Orthopaedic Surgeon; PPI: Patient & Public Involvement group member; MD: Physician; PT: Physical Therapist; Rad: Radiologist; Res: Researcher)

### Taxonomy – Delphi domain 3

Although strong consensus was achieved for statements 32, 33 and 35, few outliers (mainly orthopaedic surgeons and a physical therapist) were not convinced (Figure 3). After removing two outliers for statement 34, the Delphi panel reached consensus on the importance of distinguishing between primary and secondary cam morphology in patients with femoroacetabular impingement syndrome.

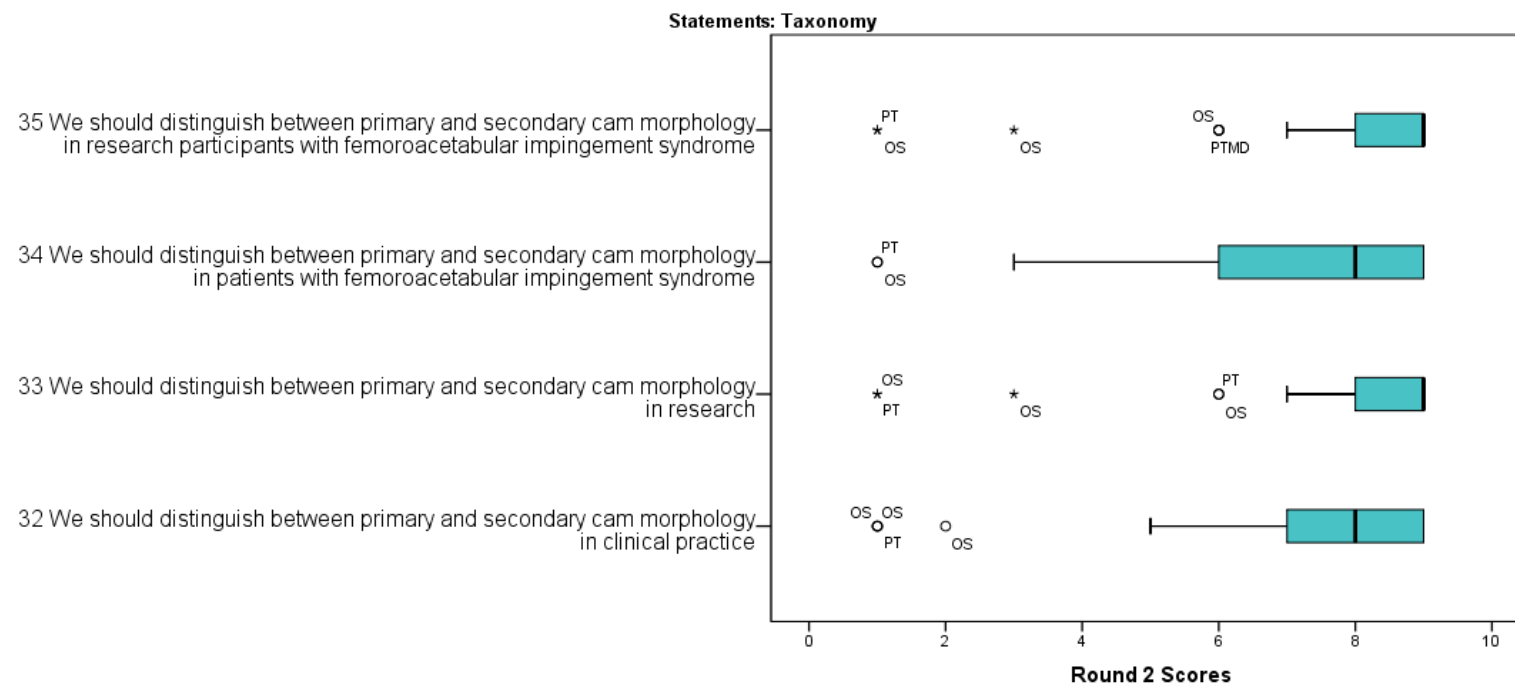

**Figure SF7-3** Outliers for statements 32 to 35 (OS: Orthopaedic Surgeon; PPI: Patient & Public Involvement group member; MD: Physician; PT: Physical Therapist; Rad: Radiologist; Res: Researcher)

## Imaging outcomes – Delphi domain 4

Six of 12 imaging outcomes statements (Statements 36, 39, 42, 44, 45, and 46) had outliers. (Figure 4). After eliminating the two orthopaedic surgeon outliers for marginally non-consensus statement 46, the Delphi panel reached consensus that the alpha angle as a continuous variable, reported for anteroposterior (AP) pelvis and Dunn 45° view radiographs, should be the radiographic imaging outcome measure for research on primary cam morphology prognosis.

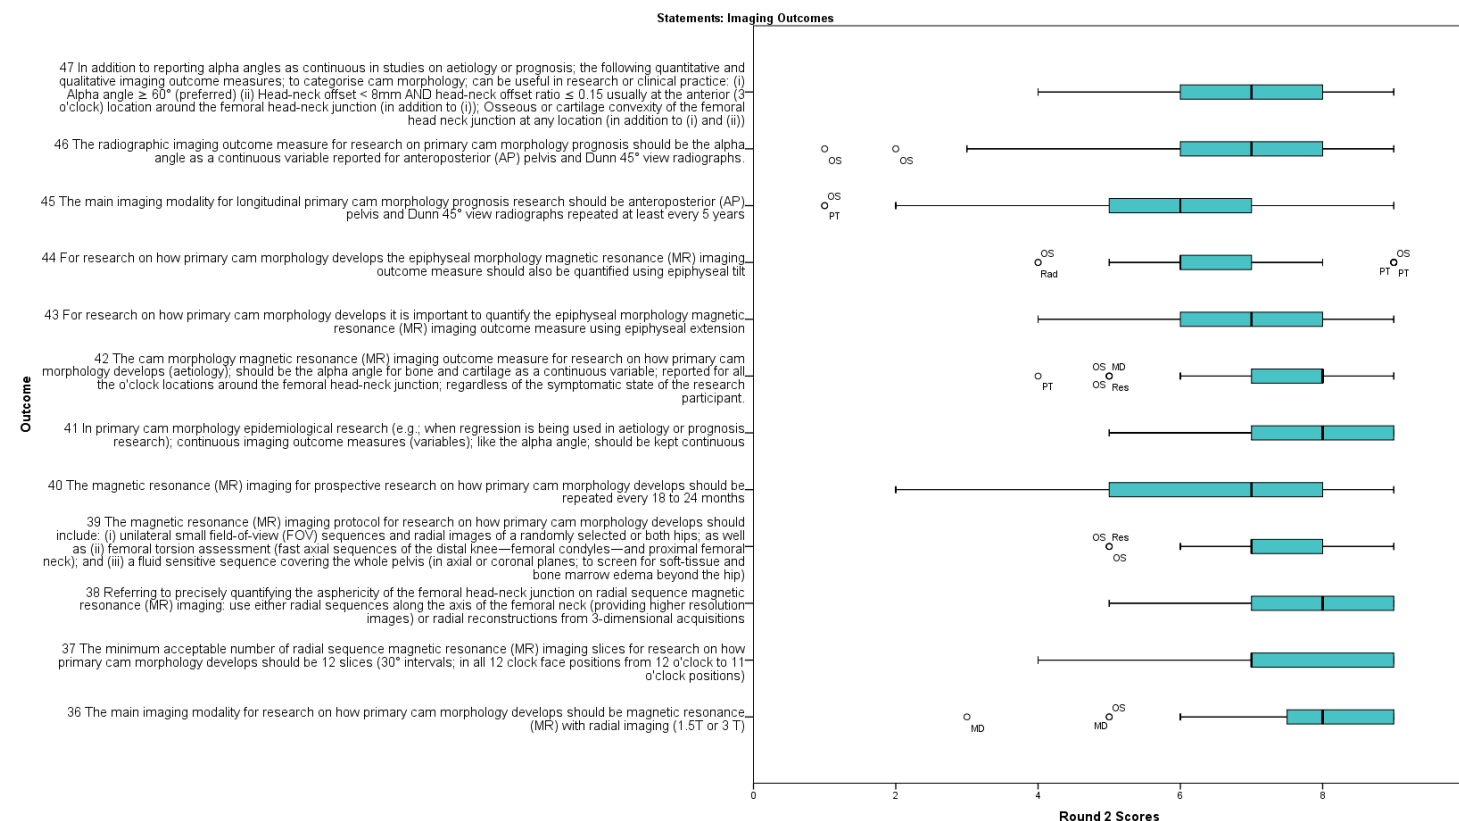

**Figure SF7-4** Outliers for statements 32 to 35 (OS: Orthopaedic Surgeon; PPI: Patient & Public Involvement group member; MD: Physician; PT: Physical Therapist; Rad: Radiologist; Res: Researcher)

## Bipolarity analysis

Opposing groups of experts with an important and insoluble cleft of opinion, might result in non-consensus. Bipolar data distribution is therefore a possible explanation for dissent. To test for bipolarity, we investigated potential bimodal distribution (two or more answer options had the same mode frequency) and visually inspected histograms for round 2 scores of each statement. [1]

### Definitions – Delphi domain 1

There were no bimodal distribution in the overall scoring of definition statements in round 2. (Figure 5)

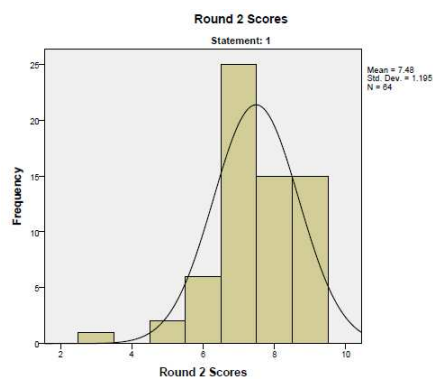

Figure 5a Statement 1

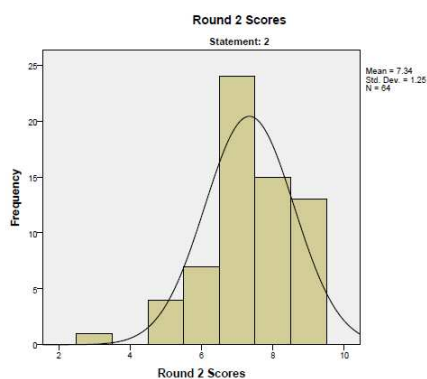

Figure 5b Statement 2

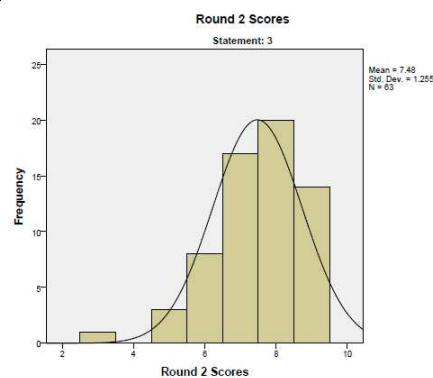

Figure 5c Statement 3

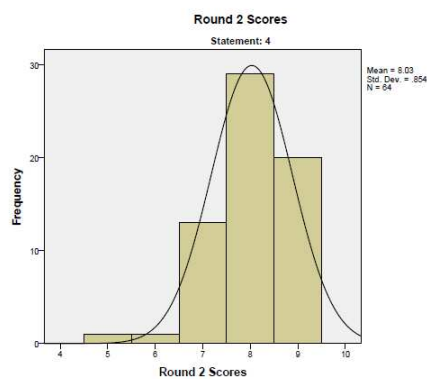

Figure 5d Statement 4

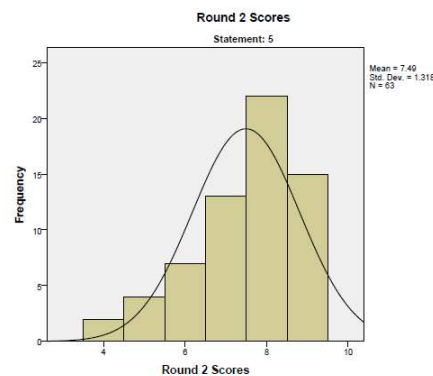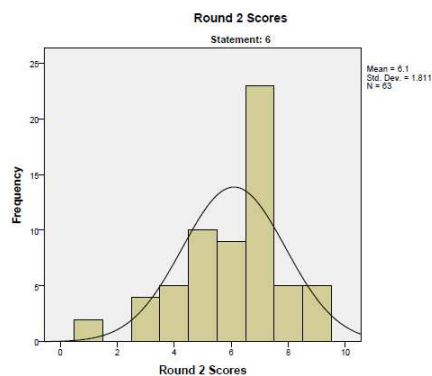



**Figure 5e** Statement 5

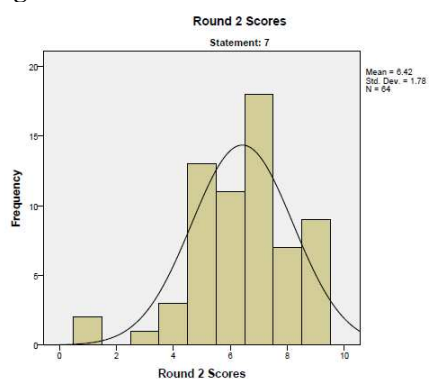

**Figure 5f** Statement 6

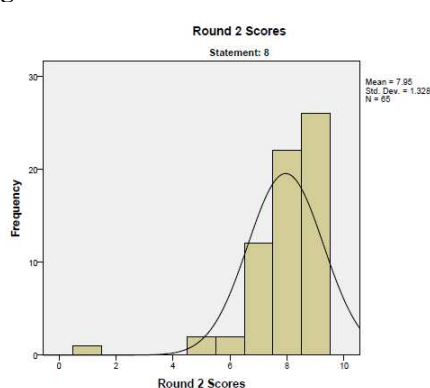

**Figure 5g** Statement 7

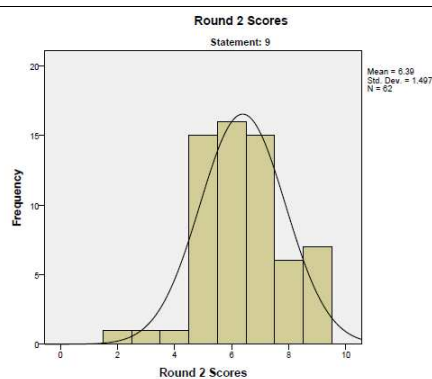

**Figure 5h** Statement 8

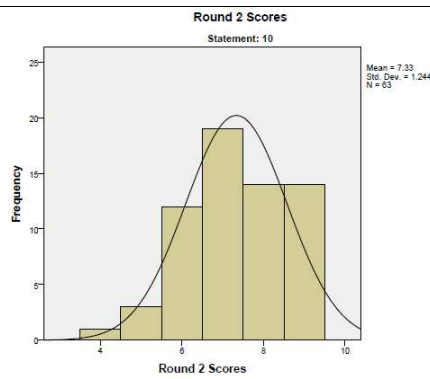

**Figure 5i** Statement 9

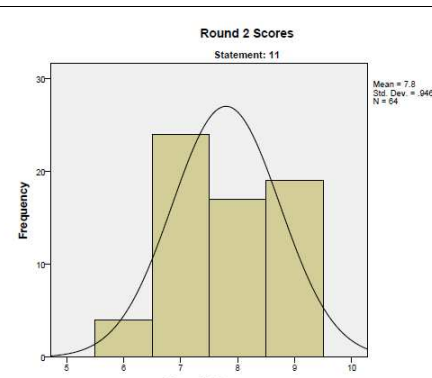

**Figure 5j** Statement 10

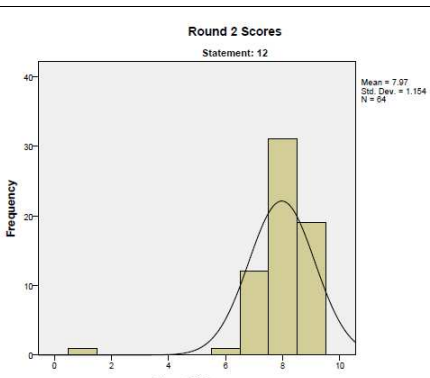

**Figure 5k** Statement 11

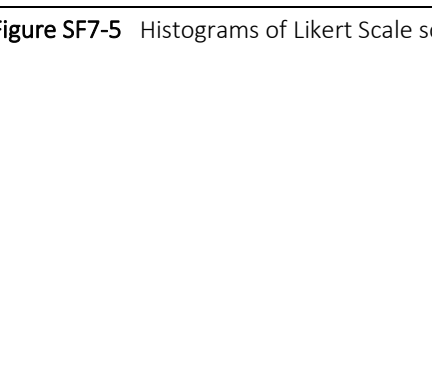

**Figure 5l** Statement 12

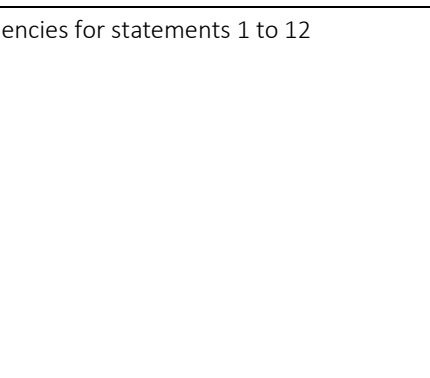

**Figure SF7-5** Histograms of Likert Scale score frequencies for statements 1 to 12

## Terminology – Delphi domain 2

There were no bimodal distribution in the overall scoring of terminology statements in round 2. (Figure 6)

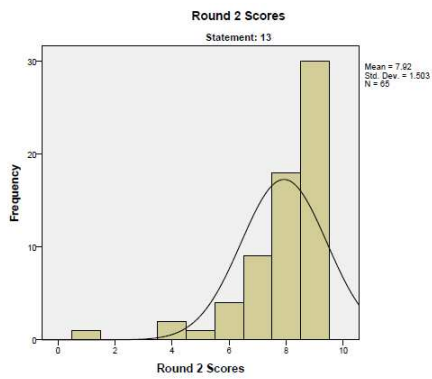

Figure 6a Statement 13

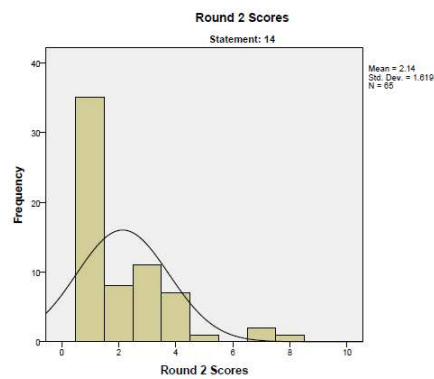

Figure 6b Statement 14

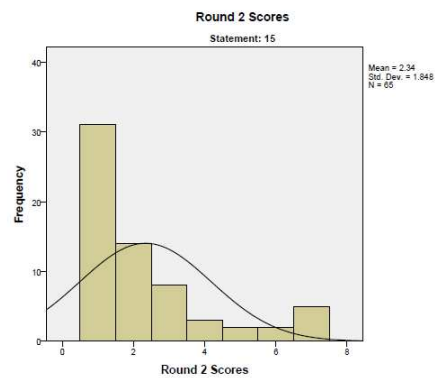

Figure 6c Statement 15

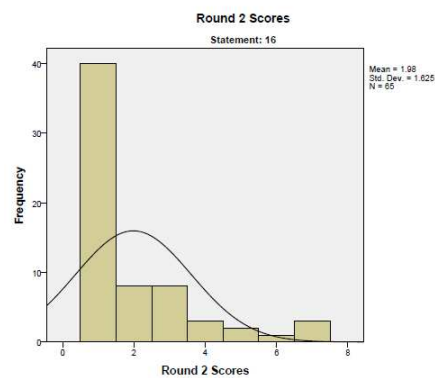

Figure 6d Statement 16

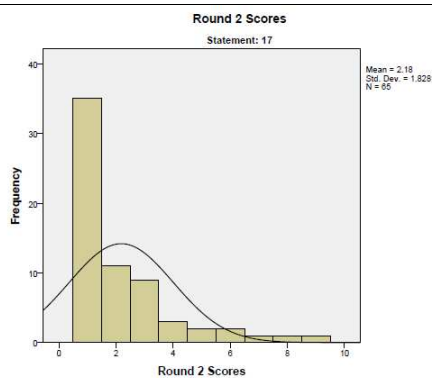

Figure 6e Statement 17

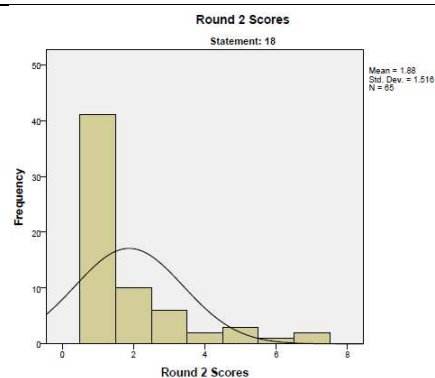

Figure 6f Statement 18

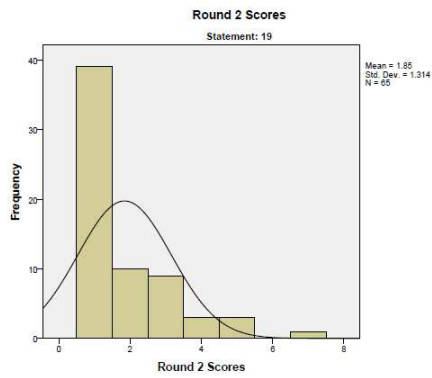

Figure 6g Statement 19

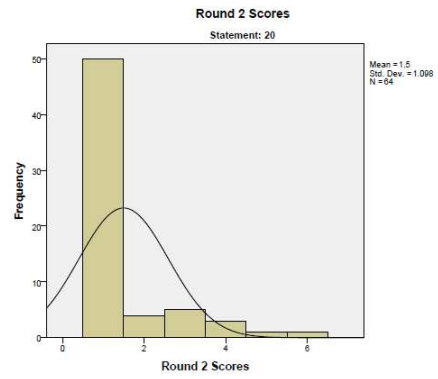

Figure 6h Statement 20

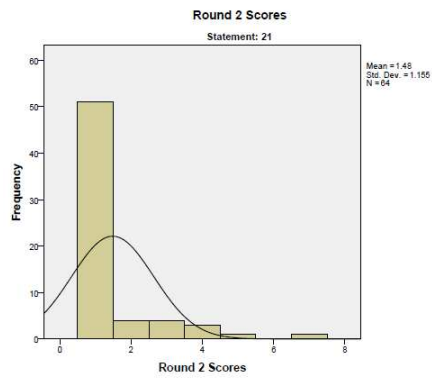

Figure 6i Statement 21

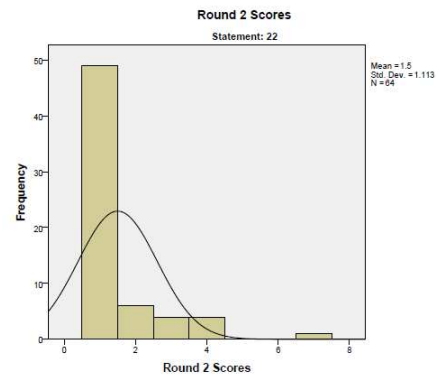

Figure 6j Statement 22

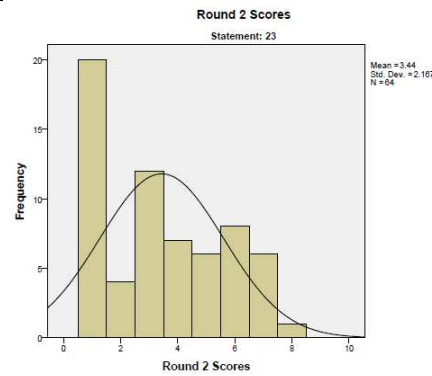

Figure 6k Statement 23

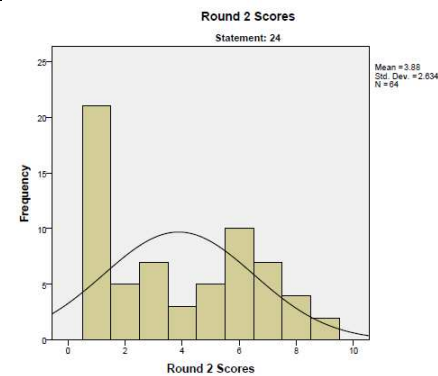

Figure 6l Statement 24

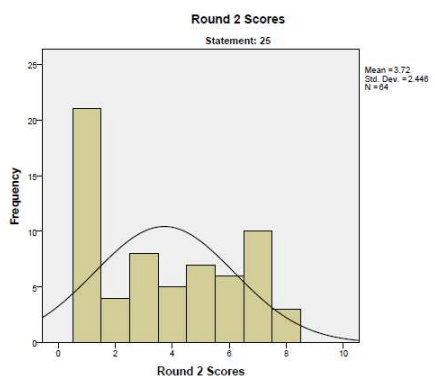

Figure 6m Statement 25

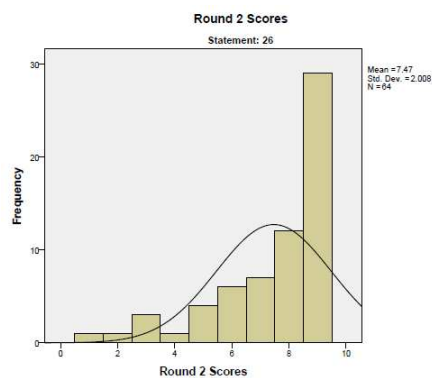

Figure 6n Statement 26

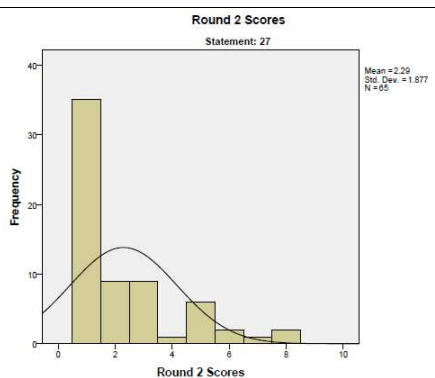

Figure 6o Statement 27

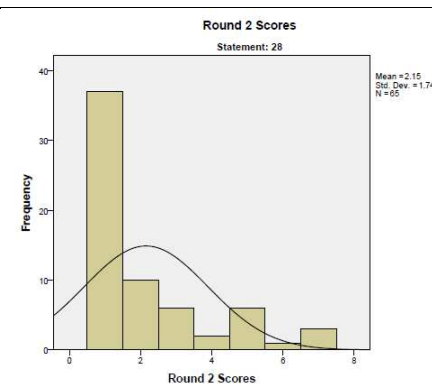

Figure 6p Statement 28

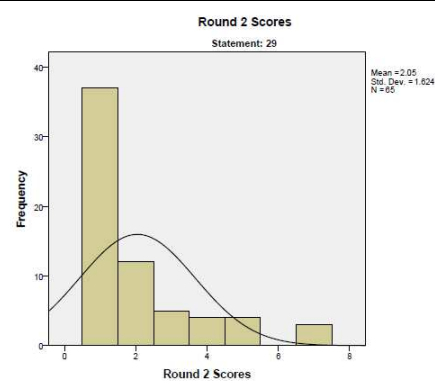

Figure 6q Statement 29

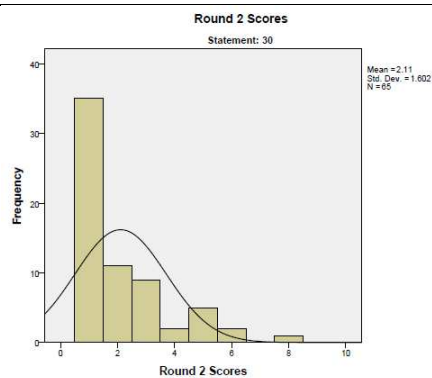

Figure 6r Statement 30

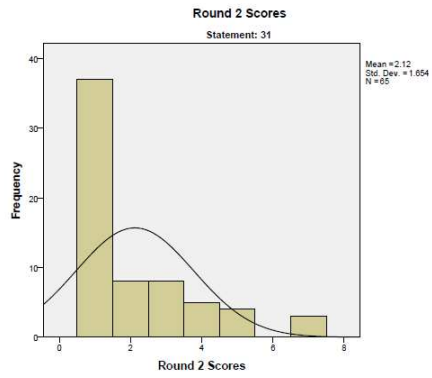

**Figure 6s** Statement 31

**Figure SF7-6** Histograms of Likert Scale score frequencies for statements 13 to 31

### Taxonomy – Delphi domain 3

There were no bimodal distribution in the overall scoring of taxonomy statements in round 2. (Figure 7)

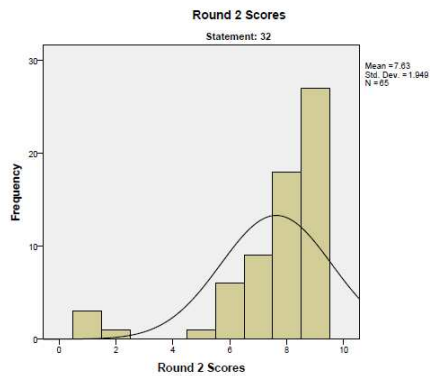

**Figure 7a** Statement 32

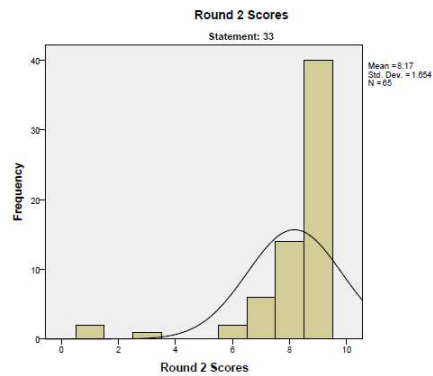

**Figure 7b** Statement 33

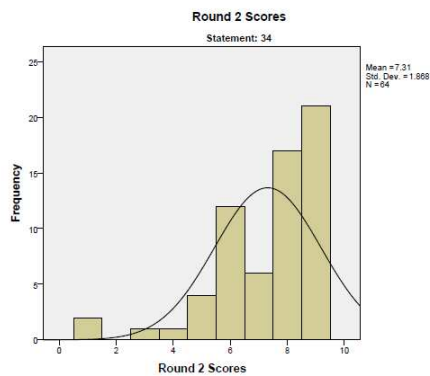

**Figure 7c** Statement 34

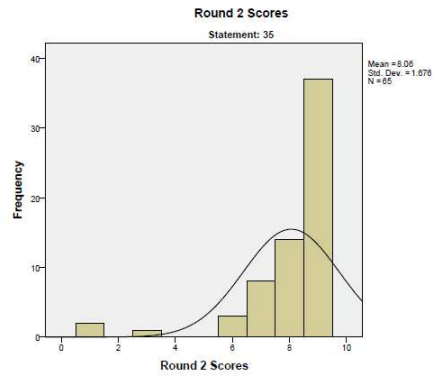

**Figure 7d** Statement 35

**Figure SF7-7** Histograms of Likert Scale score frequencies for statements 32 to 35

## Imaging outcomes – Delphi domain 4

There were no bimodal distribution in the overall scoring of imaging outcomes statements in round 2. (Figure 8)

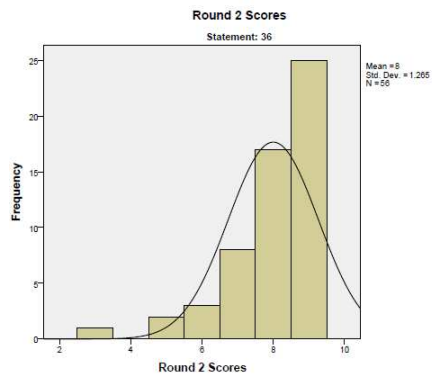

**Figure 8a** Statement 36

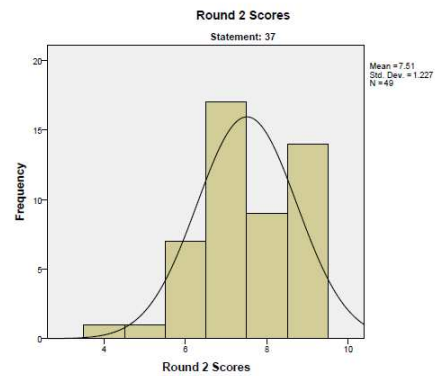

**Figure 8b** Statement 37

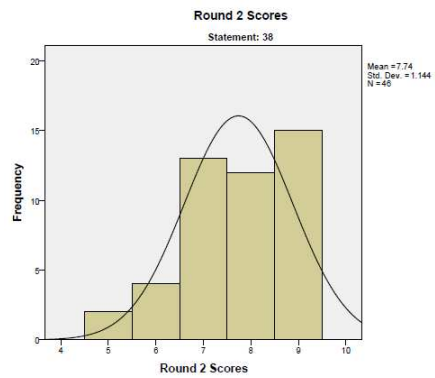

**Figure 8c** Statement 38

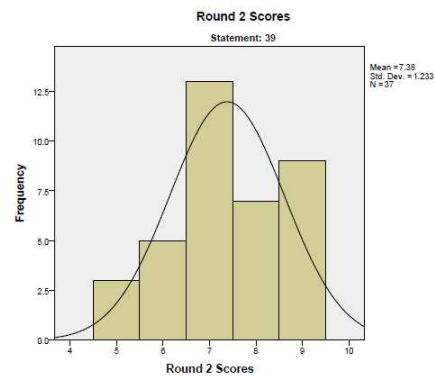

**Figure 8d** Statement 39

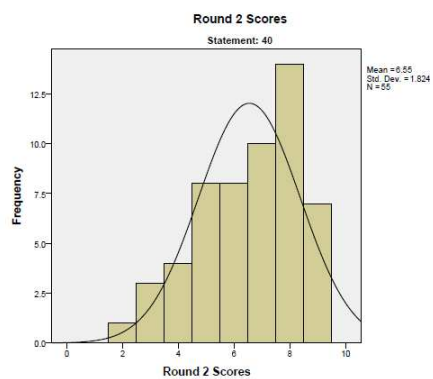

**Figure 8e** Statement 40

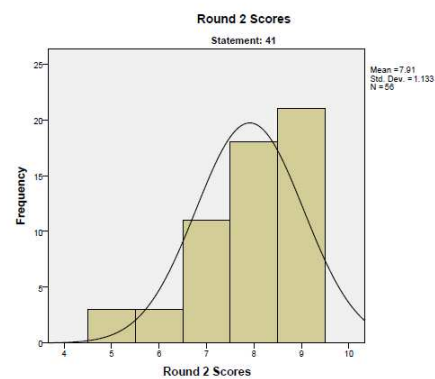

**Figure 8f** Statement 41

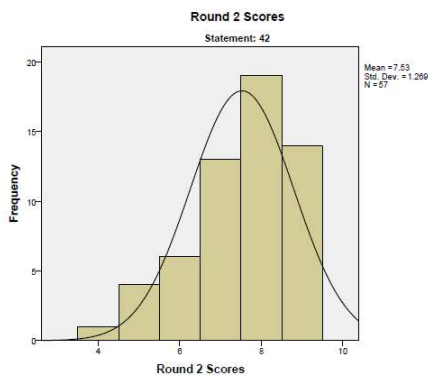

Figure 8g Statement 42

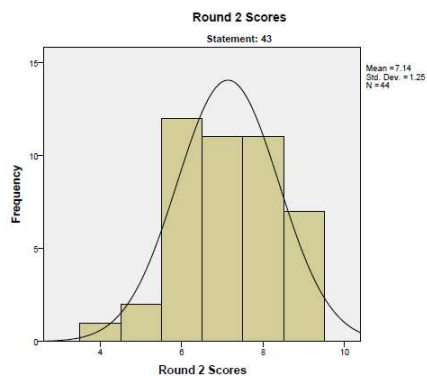

Figure 8h Statement 43

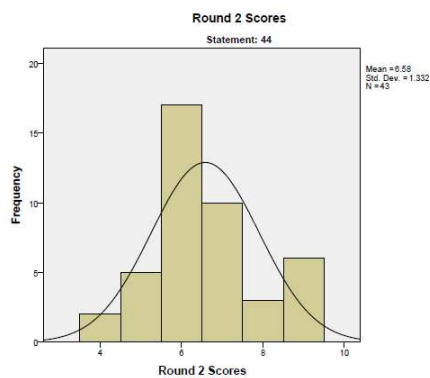

Figure 8i Statement 44

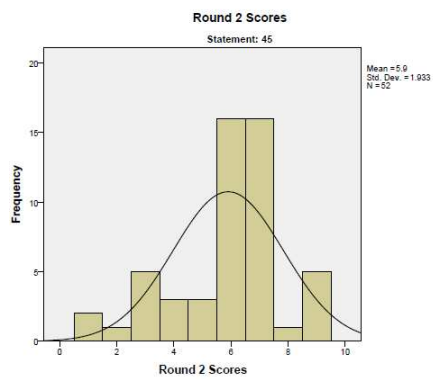

Figure 8j Statement 45

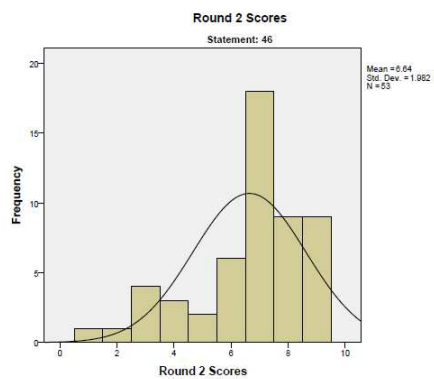

Figure 8k Statement 46

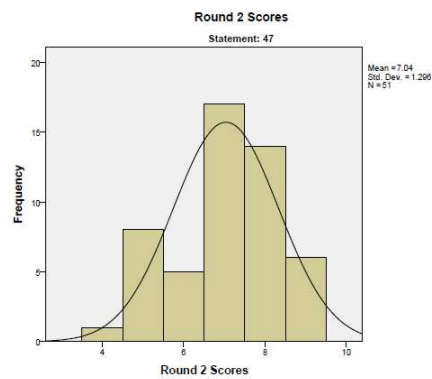

Figure 8l Statement 47

Figure SF7-8 Histograms of Likert Scale score frequencies for statements 36 to 47



## Stakeholder Group analysis

Stakeholder group analysis: Stakeholder group analysis, a classical dissent analysis, is important to identify opposing views. To compare the scores from Round 2 between the six stakeholder groups, we performed non-parametric Kruskal-Wallis test (not assuming a normal distribution of the underlying data). To account for multiple post hoc comparisons, we adjusted the statistical significance threshold p-value to 0.003 according to Bonferroni method. However, agreeing with the general view that “a declaration of ‘statistical significance’ has today become meaningless”, [3] substantial stakeholder group differences ( $p < 0.0033$ ) prompted us to further scrutinise individual- and group opinions for the specific statement.

### Definitions – Delphi domain 1

There was no statistically significant difference in how stakeholder groups scored the definition statements in round 1 and 2.

**Table SF7-1** Kruskal-Wallis test to compare Orthopaedic Surgeons vs other stakeholder groups (p-values)

| Statement                                                                                                                                                                                                                                                                         | Orthopaedic surgeons vs PPI |         | Orthopaedic surgeons vs physical therapists |         | Orthopaedic surgeons vs physicians |         | Orthopaedic surgeons vs radiologists |         | Orthopaedic surgeons vs researchers |         |
|-----------------------------------------------------------------------------------------------------------------------------------------------------------------------------------------------------------------------------------------------------------------------------------|-----------------------------|---------|---------------------------------------------|---------|------------------------------------|---------|--------------------------------------|---------|-------------------------------------|---------|
|                                                                                                                                                                                                                                                                                   | Round 1                     | Round 2 | Round 1                                     | Round 2 | Round 1                            | Round 2 | Round 1                              | Round 2 | Round 1                             | Round 2 |
| 01_Primary cam morphology develops during skeletal maturation as a normal physiological response to load                                                                                                                                                                          | .694                        | .310    | .837                                        | .857    | .629                               | .807    | .379                                 | .155    | .103                                | .094    |
| 02_Primary cam morphology is not caused by previous disease, injury or an acute event; it represents a normal physiological response of the maturing skeleton to load                                                                                                             | .666                        | .611    | .400                                        | .108    | .678                               | .511    | .953                                 | .296    | .285                                | .380    |
| 03_Secondary cam morphology develops due to existing hip disease or acute trauma; including Perthes disease; slipped capital femoral epiphysis, healed proximal femoral fractures or acute fracture                                                                               | .528                        | .128    | .396                                        | .048    | .767                               | .085    | .708                                 | .189    | .331                                | .508    |
| 04_Primary cam morphology develops in young and active individuals, including athletes, likely due to load (e.g., sporting activity) during prepubertal and pubertal skeletal maturation (load during growth) and its (physiological) effect on the proximal femoral growth plate | .572                        | .258    | .453                                        | .746    | .265                               | .691    | .522                                 | .219    | .016                                | .021    |

|                                                                                                                                                                                                                                                                  |      |      |      |      |      |      |      |      |      |       |
|------------------------------------------------------------------------------------------------------------------------------------------------------------------------------------------------------------------------------------------------------------------|------|------|------|------|------|------|------|------|------|-------|
| 05_ Primary cam morphology is common in young and active males, including athletes, likely due to sporting activity during prepubertal and pubertal skeletal maturation (load during growth) and its (physiological) effect on the proximal femoral growth plate | .364 | .134 | .624 | .622 | .254 | .513 | .019 | .011 | .045 | .024  |
| 06_ Primary cam morphology includes cam morphology of unknown origin                                                                                                                                                                                             | .072 | .290 | .024 | .766 | .170 | .158 | .763 | .782 | .112 | 1.000 |
| 07_ Cam morphology that develops in young and active individuals without any symptoms (e.g., hip-related pain; stiffness) or history of previous/existing hip disease, is primary cam morphology until proven otherwise                                          | .527 | .121 | .212 | .110 | .229 | .012 | .471 | .825 | .901 | .578  |
| 08_ Cam morphology is a cartilage or bony prominence (bump) of varying size at any location around the femoral head-neck junction, which changes the shape of the femoral head from spherical to aspherical                                                      | .131 | .028 | .409 | .015 | .652 | .028 | .293 | .042 | .741 | .832  |
| 09_ Primary cam morphology often occurs in male athletes in both hips                                                                                                                                                                                            | .891 | .900 | .936 | .807 | .899 | .700 | .437 | .398 | .162 | .047  |
| 10_ The most common outcome measure for cam morphology is a cartilage or bone alpha angle as a dichotomised or continuous variable on radiographs, computed tomogram (CT) scans or magnetic resonance (MR) imaging, reported per hip, per person or both         | .719 | .913 | .593 | .981 | .882 | .719 | .435 | .155 | .167 | .059  |
| 11_ Primary cam morphology likely develops during maturation in young adolescents (with no current or previous hip disease), possibly due to high-load sporting activity and other unconfirmed risk factors                                                      | .631 | .329 | .514 | .636 | .505 | .830 | .231 | .832 | .109 | .163  |

|                                                                                                                                                                                                                                                                                                                                                                                                                                                                                                                                                                                                                                                                                                                                       |      |      |      |      |      |      |      |      |      |      |
|---------------------------------------------------------------------------------------------------------------------------------------------------------------------------------------------------------------------------------------------------------------------------------------------------------------------------------------------------------------------------------------------------------------------------------------------------------------------------------------------------------------------------------------------------------------------------------------------------------------------------------------------------------------------------------------------------------------------------------------|------|------|------|------|------|------|------|------|------|------|
| 12_A comprehensive definition for primary cam morphology would be: Primary cam morphology is a cartilage or bony prominence (bump) of varying size at any location around the femoral head-neck junction, which changes the shape of the femoral head from spherical to aspherical. It often occurs in male athletes in both hips. The most common outcome measure is a cartilage or bone alpha angle as a dichotomised or continuous variable on radiographs, CT scans or MR imaging, reported per hip, per person or both. Primary cam morphology likely develops during maturation in young adolescents (with no current or previous hip disease), possibly due to high-load sporting activity and other unconfirmed risk factors. | .221 | .205 | .409 | .117 | .481 | .308 | .268 | .154 | .671 | .926 |
|---------------------------------------------------------------------------------------------------------------------------------------------------------------------------------------------------------------------------------------------------------------------------------------------------------------------------------------------------------------------------------------------------------------------------------------------------------------------------------------------------------------------------------------------------------------------------------------------------------------------------------------------------------------------------------------------------------------------------------------|------|------|------|------|------|------|------|------|------|------|

**Table SF7-2** Kruskal-Wallis test to compare Patient & Public Involvement Group (PPI) vs other stakeholder groups (p-values)

| Statement                                                                                                                                                             | PPI vs Orthopaedic surgeons |         | PPI vs physical therapists |         | PPI vs physicians |         | PPI vs radiologists |         | PPI vs researchers |         |
|-----------------------------------------------------------------------------------------------------------------------------------------------------------------------|-----------------------------|---------|----------------------------|---------|-------------------|---------|---------------------|---------|--------------------|---------|
|                                                                                                                                                                       | Round 1                     | Round 2 | Round 1                    | Round 2 | Round 1           | Round 2 | Round 1             | Round 2 | Round 1            | Round 2 |
| 01_Primary cam morphology develops during skeletal maturation as a normal physiological response to load                                                              | .694                        | .310    | .767                       | .385    | .387              | .288    | .193                | .868    | .128               | .925    |
| 02_Primary cam morphology is not caused by previous disease, injury or an acute event; it represents a normal physiological response of the maturing skeleton to load | .666                        | .611    | .677                       | .284    | .561              | .898    | .533                | .574    | .353               | .215    |
| 03_Secondary cam morphology develops due to existing hip disease or acute trauma; including Perthes disease; slipped                                                  | .528                        | .128    | .952                       | .680    | .368              | .869    | .756                | 1.000   | .165               | .314    |

|                                                                                                                                                                                                                                                                                   |      |      |      |      |      |      |      |      |      |      |
|-----------------------------------------------------------------------------------------------------------------------------------------------------------------------------------------------------------------------------------------------------------------------------------|------|------|------|------|------|------|------|------|------|------|
| capital femoral epiphysis, healed proximal femoral fractures or acute fracture                                                                                                                                                                                                    |      |      |      |      |      |      |      |      |      |      |
| 04_Primary cam morphology develops in young and active individuals, including athletes, likely due to load (e.g., sporting activity) during prepubertal and pubertal skeletal maturation (load during growth) and its (physiological) effect on the proximal femoral growth plate | .572 | .258 | .234 | .112 | .615 | .211 | .759 | .725 | .098 | .087 |
| 05_Primary cam morphology is common in young and active males, including athletes, likely due to sporting activity during prepubertal and pubertal skeletal maturation (load during growth) and its (physiological) effect on the proximal femoral growth plate                   | .364 | .134 | .502 | .243 | .655 | .161 | .646 | .435 | .722 | .494 |
| 06_Primary cam morphology includes cam morphology of unknown origin                                                                                                                                                                                                               | .072 | .290 | .931 | .328 | .563 | .653 | .245 | .134 | .583 | .262 |
| 07_Cam morphology that develops in young and active individuals without any symptoms (e.g., hip-related pain; stiffness) or history of previous/existing hip disease, is primary cam morphology until proven otherwise                                                            | .527 | .121 | .419 | .918 | .540 | .254 | .231 | .122 | .468 | .291 |
| 08_Cam morphology is a cartilage or bony prominence (bump) of varying size at any location around the femoral head-neck junction, which changes the shape of the femoral head from spherical to aspherical                                                                        | .131 | .028 | .363 | .955 | .175 | .679 | .687 | .855 | .037 | .022 |
| 09_Primary cam morphology often occurs in male athletes in both hips                                                                                                                                                                                                              | .891 | .900 | .877 | .885 | .912 | .835 | .738 | .498 | .185 | .062 |
| 10_The most common outcome measure for cam morphology is a cartilage or bone alpha angle as a dichotomised or continuous variable on radiographs,                                                                                                                                 | .719 | .913 | .353 | .755 | .769 | .389 | .305 | .039 | .266 | .016 |

|                                                                                                                                                                                                                                                                                                                                                                                                                                                                                                                                                                                                                                                                                                                                       |      |      |      |      |      |      |      |      |      |      |
|---------------------------------------------------------------------------------------------------------------------------------------------------------------------------------------------------------------------------------------------------------------------------------------------------------------------------------------------------------------------------------------------------------------------------------------------------------------------------------------------------------------------------------------------------------------------------------------------------------------------------------------------------------------------------------------------------------------------------------------|------|------|------|------|------|------|------|------|------|------|
| computed tomogram (CT) scans or magnetic resonance (MR) imaging, reported per hip, per person or both                                                                                                                                                                                                                                                                                                                                                                                                                                                                                                                                                                                                                                 |      |      |      |      |      |      |      |      |      |      |
| 11_ Primary cam morphology likely develops during maturation in young adolescents (with no current or previous hip disease), possibly due to high-load sporting activity and other unconfirmed risk factors                                                                                                                                                                                                                                                                                                                                                                                                                                                                                                                           | .631 | .329 | .836 | .606 | .944 | .184 | .431 | .242 | .226 | .326 |
| 12_A comprehensive definition for primary cam morphology would be: Primary cam morphology is a cartilage or bony prominence (bump) of varying size at any location around the femoral head-neck junction, which changes the shape of the femoral head from spherical to aspherical. It often occurs in male athletes in both hips. The most common outcome measure is a cartilage or bone alpha angle as a dichotomised or continuous variable on radiographs, CT scans or MR imaging, reported per hip, per person or both. Primary cam morphology likely develops during maturation in young adolescents (with no current or previous hip disease), possibly due to high-load sporting activity and other unconfirmed risk factors. | .221 | .205 | .592 | .865 | .465 | .689 | .953 | .811 | .123 | .167 |

**Table SF7-3** Kruskal-Wallis test to compare Physical Therapists vs other stakeholder groups (p-values)

| Statement                                                                                                                                                                                                                                                                          | Physical Therapists vs Orthopaedic surgeons |         | Physical therapists vs PPI |         | Physical Therapists vs physicians |         | Physical Therapists vs radiologists |         | Physical Therapists vs researchers |         |
|------------------------------------------------------------------------------------------------------------------------------------------------------------------------------------------------------------------------------------------------------------------------------------|---------------------------------------------|---------|----------------------------|---------|-----------------------------------|---------|-------------------------------------|---------|------------------------------------|---------|
|                                                                                                                                                                                                                                                                                    | Round 1                                     | Round 2 | Round 1                    | Round 2 | Round 1                           | Round 2 | Round 1                             | Round 2 | Round 1                            | Round 2 |
| 01_ Primary cam morphology develops during skeletal maturation as a normal physiological response to load                                                                                                                                                                          | .837                                        | .857    | .767                       | .385    | .487                              | .982    | .343                                | .234    | .087                               | .152    |
| 02_ Primary cam morphology is not caused by previous disease, injury or an acute event; it represents a normal physiological response of the maturing skeleton to load                                                                                                             | .400                                        | .108    | .677                       | .284    | .186                              | .225    | .550                                | .485    | .050                               | .008    |
| 03_ Secondary cam morphology develops due to existing hip disease or acute trauma; including Perthes disease; slipped capital femoral epiphysis, healed proximal femoral fractures or acute fracture                                                                               | .396                                        | .048    | .952                       | .680    | .371                              | .663    | .787                                | .490    | .097                               | .213    |
| 04_ Primary cam morphology develops in young and active individuals, including athletes, likely due to load (e.g., sporting activity) during prepubertal and pubertal skeletal maturation (load during growth) and its (physiological) effect on the proximal femoral growth plate | .453                                        | .746    | .234                       | .112    | .055                              | .371    | .231                                | .112    | .006                               | .007    |
| 05_ Primary cam morphology is common in young and active males, including athletes, likely due to sporting activity during prepubertal and pubertal skeletal maturation (load during growth) and its (physiological) effect on the proximal femoral growth plate                   | .624                                        | .622    | .502                       | .243    | .855                              | .926    | .101                                | .031    | .142                               | .048    |
| 06_ Primary cam morphology includes cam morphology of unknown origin                                                                                                                                                                                                               | .024                                        | .766    | .931                       | .328    | .583                              | .192    | .293                                | .366    | .545                               | .800    |
| 07_ Cam morphology that develops in young and active individuals without any                                                                                                                                                                                                       | .212                                        | .110    | .419                       | .918    | .804                              | .324    | .093                                | .080    | .198                               | .280    |

symptoms (e.g., hip-related pain; stiffness) or history of previous/existing hip disease, is primary cam morphology until proven otherwise

|                                                                                                                                                                                                                                                                                                                                                                                                                                                |      |      |      |      |      |      |      |      |      |      |
|------------------------------------------------------------------------------------------------------------------------------------------------------------------------------------------------------------------------------------------------------------------------------------------------------------------------------------------------------------------------------------------------------------------------------------------------|------|------|------|------|------|------|------|------|------|------|
| 08_ Cam morphology is a cartilage or bony prominence (bump) of varying size at any location around the femoral head-neck junction, which changes the shape of the femoral head from spherical to aspherical                                                                                                                                                                                                                                    | .409 | .015 | .363 | .955 | .690 | .647 | .647 | .906 | .243 | .021 |
| 09_Primary cam morphology often occurs in male athletes in both hips                                                                                                                                                                                                                                                                                                                                                                           | .936 | .807 | .877 | .885 | .964 | .680 | .475 | .404 | .214 | .038 |
| 10_The most common outcome measure for cam morphology is a cartilage or bone alpha angle as a dichotomised or continuous variable on radiographs, computed tomogram (CT) scans or magnetic resonance (MR) imaging, reported per hip, per person or both                                                                                                                                                                                        | .593 | .981 | .353 | .755 | .400 | .863 | .562 | .120 | .041 | .032 |
| 11_ Primary cam morphology likely develops during maturation in young adolescents (with no current or previous hip disease), possibly due to high-load sporting activity and other unconfirmed risk factors                                                                                                                                                                                                                                    | .514 | .636 | .836 | .606 | .928 | .595 | .568 | .669 | .386 | .211 |
| 12_A comprehensive definition for primary cam morphology would be: Primary cam morphology is a cartilage or bony prominence (bump) of varying size at any location around the femoral head-neck junction, which changes the shape of the femoral head from spherical to aspherical. It often occurs in male athletes in both hips. The most common outcome measure is a cartilage or bone alpha angle as a dichotomised or continuous variable | .409 | .117 | .592 | .865 | .889 | .525 | .609 | .936 | .249 | .095 |

on radiographs, CT scans or MR imaging, reported per hip, per person or both. Primary cam morphology likely develops during maturation in young adolescents (with no current or previous hip disease), possibly due to high-load sporting activity and other unconfirmed risk factors.

**Table SF7-4** Kruskal-Wallis test to compare Physicians vs other stakeholder groups (p-values)

| Statement                                                                                                                                                                                                                                                                         | Physicians vs Orthopaedic surgeons |         | Physicians vs PPI |         | Physicians vs Physical Therapists |         | Physicians vs radiologists |         | Physicians vs researchers |         |
|-----------------------------------------------------------------------------------------------------------------------------------------------------------------------------------------------------------------------------------------------------------------------------------|------------------------------------|---------|-------------------|---------|-----------------------------------|---------|----------------------------|---------|---------------------------|---------|
|                                                                                                                                                                                                                                                                                   | Round 1                            | Round 2 | Round 1           | Round 2 | Round 1                           | Round 2 | Round 1                    | Round 2 | Round 1                   | Round 2 |
| 01_Primary cam morphology develops during skeletal maturation as a normal physiological response to load                                                                                                                                                                          | .629                               | .807    | .387              | .288    | .487                              | .982    | .716                       | .186    | .196                      | .069    |
| 02_Primary cam morphology is not caused by previous disease, injury or an acute event; it represents a normal physiological response of the maturing skeleton to load                                                                                                             | .678                               | .511    | .561              | .898    | .186                              | .225    | .412                       | .574    | .318                      | .059    |
| 03_Secondary cam morphology develops due to existing hip disease or acute trauma; including Perthes disease; slipped capital femoral epiphysis, healed proximal femoral fractures or acute fracture                                                                               | .767                               | .085    | .368              | .869    | .371                              | .663    | .340                       | .924    | .251                      | .216    |
| 04_Primary cam morphology develops in young and active individuals, including athletes, likely due to load (e.g., sporting activity) during prepubertal and pubertal skeletal maturation (load during growth) and its (physiological) effect on the proximal femoral growth plate | .265                               | .691    | .615              | .211    | .055                              | .371    | .775                       | .181    | .174                      | .005    |
| 05_Primary cam morphology is common in young and active males, including                                                                                                                                                                                                          | .254                               | .513    | .655              | .161    | .855                              | .926    | .039                       | .004    | .064                      | .015    |



athletes, likely due to sporting activity during prepubertal and pubertal skeletal maturation (load during growth) and its (physiological) effect on the proximal femoral growth plate

|                                                                                                                                                                                                                                                         |      |      |      |      |      |      |      |       |      |      |
|---------------------------------------------------------------------------------------------------------------------------------------------------------------------------------------------------------------------------------------------------------|------|------|------|------|------|------|------|-------|------|------|
| 06_Primary cam morphology includes cam morphology of unknown origin                                                                                                                                                                                     | .170 | .158 | .563 | .653 | .583 | .192 | .740 | .140  | .869 | .151 |
| 07_Cam morphology that develops in young and active individuals without any symptoms (e.g., hip-related pain; stiffness) or history of previous/existing hip disease, is primary cam morphology until proven otherwise                                  | .229 | .012 | .540 | .254 | .804 | .324 | .074 | .031  | .175 | .049 |
| 08_Cam morphology is a cartilage or bony prominence (bump) of varying size at any location around the femoral head-neck junction, which changes the shape of the femoral head from spherical to aspherical                                              | .652 | .028 | .175 | .679 | .690 | .647 | .378 | .552  | .194 | .019 |
| 09_Primary cam morphology often occurs in male athletes in both hips                                                                                                                                                                                    | .899 | .700 | .912 | .835 | .964 | .680 | .422 | .311  | .149 | .016 |
| 10_The most common outcome measure for cam morphology is a cartilage or bone alpha angle as a dichotomised or continuous variable on radiographs, computed tomogram (CT) scans or magnetic resonance (MR) imaging, reported per hip, per person or both | .882 | .719 | .769 | .389 | .400 | .863 | .235 | .079  | .101 | .006 |
| 11_Primary cam morphology likely develops during maturation in young adolescents (with no current or previous hip disease), possibly due to high-load sporting activity and other unconfirmed risk factors                                              | .505 | .830 | .944 | .184 | .928 | .595 | .465 | 1.000 | .174 | .081 |
| 12_A comprehensive definition for primary cam morphology would be:                                                                                                                                                                                      | .481 | .308 | .465 | .689 | .889 | .525 | .480 | .498  | .254 | .291 |

Primary cam morphology is a cartilage or bony prominence (bump) of varying size at any location around the femoral head-neck junction, which changes the shape of the femoral head from spherical to aspherical. It often occurs in male athletes in both hips. The most common outcome measure is a cartilage or bone alpha angle as a dichotomised or continuous variable on radiographs, CT scans or MR imaging, reported per hip, per person or both. Primary cam morphology likely develops during maturation in young adolescents (with no current or previous hip disease), possibly due to high-load sporting activity and other unconfirmed risk factors.

**Table SF7-5** Kruskal-Wallis test to compare Radiologists vs other stakeholder groups (p-values)

| Statement                                                                                                                                                                                           | Radiologists vs Orthopaedic surgeons |         | Radiologists vs PPI |         | Radiologists vs Physical Therapists |         | Radiologists vs Physicians |         | Radiologists vs Researchers |         |
|-----------------------------------------------------------------------------------------------------------------------------------------------------------------------------------------------------|--------------------------------------|---------|---------------------|---------|-------------------------------------|---------|----------------------------|---------|-----------------------------|---------|
|                                                                                                                                                                                                     | Round 1                              | Round 2 | Round 1             | Round 2 | Round 1                             | Round 2 | Round 1                    | Round 2 | Round 1                     | Round 2 |
| 01_Primary cam morphology develops during skeletal maturation as a normal physiological response to load                                                                                            | .379                                 | .155    | .193                | .868    | .343                                | .234    | .716                       | .186    | .499                        | .763    |
| 02_Primary cam morphology is not caused by previous disease, injury or an acute event; it represents a normal physiological response of the maturing skeleton to load                               | .953                                 | .296    | .533                | .574    | .550                                | .485    | .412                       | .574    | .071                        | .009    |
| 03_Secondary cam morphology develops due to existing hip disease or acute trauma; including Perthes disease; slipped capital femoral epiphysis, healed proximal femoral fractures or acute fracture | .708                                 | .189    | .756                | 1.000   | .787                                | .490    | .340                       | .924    | .101                        | .361    |

|                                                                                                                                                                                                                                                                                    |      |      |      |      |      |      |      |      |      |       |
|------------------------------------------------------------------------------------------------------------------------------------------------------------------------------------------------------------------------------------------------------------------------------------|------|------|------|------|------|------|------|------|------|-------|
| 04_ Primary cam morphology develops in young and active individuals, including athletes, likely due to load (e.g., sporting activity) during prepubertal and pubertal skeletal maturation (load during growth) and its (physiological) effect on the proximal femoral growth plate | .522 | .219 | .759 | .725 | .231 | .112 | .775 | .181 | .463 | .376  |
| 05_ Primary cam morphology is common in young and active males, including athletes, likely due to sporting activity during prepubertal and pubertal skeletal maturation (load during growth) and its (physiological) effect on the proximal femoral growth plate                   | .019 | .011 | .646 | .435 | .101 | .031 | .039 | .004 | .881 | 1.000 |
| 06_ Primary cam morphology includes cam morphology of unknown origin                                                                                                                                                                                                               | .763 | .782 | .245 | .134 | .293 | .366 | .740 | .140 | .709 | .690  |
| 07_ Cam morphology that develops in young and active individuals without any symptoms (e.g., hip-related pain; stiffness) or history of previous/existing hip disease, is primary cam morphology until proven otherwise                                                            | .471 | .825 | .231 | .122 | .093 | .080 | .074 | .031 | .458 | .202  |
| 08_ Cam morphology is a cartilage or bony prominence (bump) of varying size at any location around the femoral head-neck junction, which changes the shape of the femoral head from spherical to aspherical                                                                        | .293 | .042 | .687 | .855 | .647 | .906 | .378 | .552 | .065 | .026  |
| 09_ Primary cam morphology often occurs in male athletes in both hips                                                                                                                                                                                                              | .437 | .398 | .738 | .498 | .475 | .404 | .422 | .311 | .683 | .367  |
| 10_ The most common outcome measure for cam morphology is a cartilage or bone alpha angle as a dichotomised or continuous variable on radiographs, computed tomogram (CT) scans or                                                                                                 | .435 | .155 | .305 | .039 | .562 | .120 | .235 | .079 | .059 | .006  |

|                                                                                                                                                                                                                                                                                                                                                                                                                                                                                                                                                                                                                                                                                                                                       |      |      |      |      |      |      |      |       |      |      |
|---------------------------------------------------------------------------------------------------------------------------------------------------------------------------------------------------------------------------------------------------------------------------------------------------------------------------------------------------------------------------------------------------------------------------------------------------------------------------------------------------------------------------------------------------------------------------------------------------------------------------------------------------------------------------------------------------------------------------------------|------|------|------|------|------|------|------|-------|------|------|
| magnetic resonance (MR) imaging, reported per hip, per person or both                                                                                                                                                                                                                                                                                                                                                                                                                                                                                                                                                                                                                                                                 |      |      |      |      |      |      |      |       |      |      |
| 11_Primary cam morphology likely develops during maturation in young adolescents (with no current or previous hip disease), possibly due to high-load sporting activity and other unconfirmed risk factors                                                                                                                                                                                                                                                                                                                                                                                                                                                                                                                            | .231 | .832 | .431 | .242 | .568 | .669 | .465 | 1.000 | .715 | .139 |
| 12_A comprehensive definition for primary cam morphology would be: Primary cam morphology is a cartilage or bony prominence (bump) of varying size at any location around the femoral head-neck junction, which changes the shape of the femoral head from spherical to aspherical. It often occurs in male athletes in both hips. The most common outcome measure is a cartilage or bone alpha angle as a dichotomised or continuous variable on radiographs, CT scans or MR imaging, reported per hip, per person or both. Primary cam morphology likely develops during maturation in young adolescents (with no current or previous hip disease), possibly due to high-load sporting activity and other unconfirmed risk factors. | .268 | .154 | .953 | .811 | .609 | .936 | .480 | .498  | .154 | .052 |

**Table SF7-6** Kruskal-Wallis test to compare Researchers vs other stakeholder groups (p-values)

| Statement                                                                                                | Researchers vs Orthopaedic surgeons |         | Researchers vs PPI |         | Researchers vs Physical Therapists |         | Researchers vs Physicians |         | Researchers vs Radiologists |         |
|----------------------------------------------------------------------------------------------------------|-------------------------------------|---------|--------------------|---------|------------------------------------|---------|---------------------------|---------|-----------------------------|---------|
|                                                                                                          | Round 1                             | Round 2 | Round 1            | Round 2 | Round 1                            | Round 2 | Round 1                   | Round 2 | Round 1                     | Round 2 |
| 01_Primary cam morphology develops during skeletal maturation as a normal physiological response to load | .103                                | .094    | .128               | .925    | .087                               | .152    | .196                      | .069    | .499                        | .763    |

|                                                                                                                                                                                                                                                                                    |      |       |      |      |      |      |      |      |      |       |
|------------------------------------------------------------------------------------------------------------------------------------------------------------------------------------------------------------------------------------------------------------------------------------|------|-------|------|------|------|------|------|------|------|-------|
| 02_ Primary cam morphology is not caused by previous disease, injury or an acute event; it represents a normal physiological response of the maturing skeleton to load                                                                                                             | .285 | .380  | .353 | .215 | .050 | .008 | .318 | .059 | .071 | .009  |
| 03_ Secondary cam morphology develops due to existing hip disease or acute trauma; including Perthes disease; slipped capital femoral epiphysis, healed proximal femoral fractures or acute fracture                                                                               | .331 | .508  | .165 | .314 | .097 | .213 | .251 | .216 | .101 | .361  |
| 04_ Primary cam morphology develops in young and active individuals, including athletes, likely due to load (e.g., sporting activity) during prepubertal and pubertal skeletal maturation (load during growth) and its (physiological) effect on the proximal femoral growth plate | .016 | .021  | .098 | .087 | .006 | .007 | .174 | .005 | .463 | .376  |
| 05_ Primary cam morphology is common in young and active males, including athletes, likely due to sporting activity during prepubertal and pubertal skeletal maturation (load during growth) and its (physiological) effect on the proximal femoral growth plate                   | .045 | .024  | .722 | .494 | .142 | .048 | .064 | .015 | .881 | 1.000 |
| 06_ Primary cam morphology includes cam morphology of unknown origin                                                                                                                                                                                                               | .112 | 1.000 | .583 | .262 | .545 | .800 | .869 | .151 | .709 | .690  |
| 07_ Cam morphology that develops in young and active individuals without any symptoms (e.g., hip-related pain; stiffness) or history of previous/existing hip disease, is primary cam morphology until proven otherwise                                                            | .901 | .578  | .468 | .291 | .198 | .280 | .175 | .049 | .458 | .202  |
| 08_ Cam morphology is a cartilage or bony prominence (bump) of varying size at any location around the femoral head-neck junction, which changes the shape of                                                                                                                      | .741 | .832  | .037 | .022 | .243 | .021 | .194 | .019 | .065 | .026  |

|                                                                                                                                                                                                                                                                                                                                                                                                                                                                                                                                                                                                                                                                                                                                       |      |      |      |      |      |      |      |      |      |      |
|---------------------------------------------------------------------------------------------------------------------------------------------------------------------------------------------------------------------------------------------------------------------------------------------------------------------------------------------------------------------------------------------------------------------------------------------------------------------------------------------------------------------------------------------------------------------------------------------------------------------------------------------------------------------------------------------------------------------------------------|------|------|------|------|------|------|------|------|------|------|
| the femoral head from spherical to aspherical                                                                                                                                                                                                                                                                                                                                                                                                                                                                                                                                                                                                                                                                                         |      |      |      |      |      |      |      |      |      |      |
| 09_Primary cam morphology often occurs in male athletes in both hips                                                                                                                                                                                                                                                                                                                                                                                                                                                                                                                                                                                                                                                                  | .162 | .047 | .185 | .062 | .214 | .038 | .149 | .016 | .683 | .367 |
| 10_The most common outcome measure for cam morphology is a cartilage or bone alpha angle as a dichotomised or continuous variable on radiographs, computed tomogram (CT) scans or magnetic resonance (MR) imaging, reported per hip, per person or both                                                                                                                                                                                                                                                                                                                                                                                                                                                                               | .167 | .059 | .266 | .016 | .041 | .032 | .101 | .006 | .059 | .006 |
| 11_Primary cam morphology likely develops during maturation in young adolescents (with no current or previous hip disease), possibly due to high-load sporting activity and other unconfirmed risk factors                                                                                                                                                                                                                                                                                                                                                                                                                                                                                                                            | .109 | .163 | .226 | .326 | .386 | .211 | .174 | .081 | .715 | .139 |
| 12_A comprehensive definition for primary cam morphology would be: Primary cam morphology is a cartilage or bony prominence (bump) of varying size at any location around the femoral head-neck junction, which changes the shape of the femoral head from spherical to aspherical. It often occurs in male athletes in both hips. The most common outcome measure is a cartilage or bone alpha angle as a dichotomised or continuous variable on radiographs, CT scans or MR imaging, reported per hip, per person or both. Primary cam morphology likely develops during maturation in young adolescents (with no current or previous hip disease), possibly due to high-load sporting activity and other unconfirmed risk factors. | .671 | .926 | .123 | .167 | .249 | .095 | .254 | .291 | .154 | .052 |

## Terminology – Delphi domain 2

The average scores for some of the terminology statements were statistically significant different for the physical therapist stakeholder group compared to the researcher stakeholder group (Statement 23, round 1,  $p < 0.0033$ ; Statement 24, round 1,  $p < 0.001$  and round 2,  $p < 0.002$ ), and for the radiologist stakeholder group compared to the researcher stakeholder group (Statement 24, round 2,  $p < 0.0033$ ).

**Table SF7-7** Kruskal-Wallis test to compare Orthopaedic Surgeons vs other stakeholder groups (p-values)

| Statement                                                                                                                          | Orthopaedic surgeons vs PPI |         | Orthopaedic surgeons vs physical therapists |         | Orthopaedic surgeons vs physicians |         | Orthopaedic surgeons vs radiologists |         | Orthopaedic surgeons vs researchers |         |
|------------------------------------------------------------------------------------------------------------------------------------|-----------------------------|---------|---------------------------------------------|---------|------------------------------------|---------|--------------------------------------|---------|-------------------------------------|---------|
|                                                                                                                                    | Round 1                     | Round 2 | Round 1                                     | Round 2 | Round 1                            | Round 2 | Round 1                              | Round 2 | Round 1                             | Round 2 |
| 13_Cam morphology is the preferred term to use for a bone/cartilage bump at any location around the femoral head-neck junction     | .022                        | .004    | .005                                        | .001    | .025                               | .004    | .044                                 | .014    | .117                                | .065    |
| 14_Cam lesion is the preferred term to use for a bone/cartilage bump at any location around the femoral head-neck junction         | .969                        | .797    | .030                                        | .014    | .287                               | .291    | .271                                 | .190    | .925                                | .637    |
| 15_Cam deformity is the preferred term to use for a bone/cartilage bump at any location around the femoral head-neck junction      | .248                        | .350    | .003                                        | .028    | .042                               | .119    | .100                                 | .009    | .337                                | .967    |
| 16_Cam abnormality is the preferred term to use for a bone/cartilage bump at any location around the femoral head-neck junction    | .401                        | .388    | .110                                        | .059    | .327                               | .228    | .064                                 | .018    | .853                                | .764    |
| 17_Cam-type deformity is the preferred term to use for a bone/cartilage bump at any location around the femoral head-neck junction | .576                        | .512    | .216                                        | .099    | .464                               | .195    | .301                                 | .018    | .781                                | .832    |
| 18_Cam-type abnormality is the preferred term to use for a bone/cartilage bump at any location                                     | .515                        | .369    | .434                                        | .035    | .695                               | .205    | .383                                 | .018    | .814                                | .698    |

|                                                                                                                                                                      |      |      |      |      |      |      |      |      |      |      |
|----------------------------------------------------------------------------------------------------------------------------------------------------------------------|------|------|------|------|------|------|------|------|------|------|
| around the femoral head-neck junction                                                                                                                                |      |      |      |      |      |      |      |      |      |      |
| 19_Cam-type lesion is the preferred term to use for a bone/cartilage bump at any location around the femoral head-neck junction                                      | .496 | .399 | .069 | .007 | .253 | .119 | .057 | .008 | .926 | .437 |
| 20_Pistol grip deformity is the preferred term to use for a bone/cartilage bump at any location around the femoral head-neck junction                                | .858 | .507 | .957 | .329 | .913 | .321 | .533 | .105 | .156 | .957 |
| 21_Pistol grip lesion is the preferred term to use for a bone/cartilage bump at any location around the femoral head-neck junction                                   | .929 | .741 | .830 | .687 | .971 | .568 | .906 | .174 | .141 | .863 |
| 22_Pistol grip abnormality is the preferred term to use for a bone/cartilage bump at any location around the femoral head-neck junction                              | .858 | .536 | .915 | .239 | .726 | .341 | .768 | .348 | .156 | .641 |
| 23_Cam-type impingement is the preferred term to use for hip-related pain due to a bony bump at any location around the femoral head-neck junction                   | .106 | .369 | .006 | .022 | .247 | .217 | .058 | .033 | .713 | .646 |
| 24_Cam femoroacetabular impingement (FAI) is the preferred term to use for hip-related pain due to a bony bump at any location around the femoral head-neck junction | .416 | .353 | .463 | .611 | .610 | .953 | .675 | .081 | .019 | .081 |
| 25_Cam-type femoroacetabular impingement (FAI) is the preferred term to use for hip-related pain due to                                                              | .638 | .665 | .789 | .628 | .545 | .658 | .959 | .276 | .613 | .890 |



a bony bump at any location around the femoral head-neck junction

|                                                                                                                                                                                                     |      |      |      |      |      |      |      |      |      |      |
|-----------------------------------------------------------------------------------------------------------------------------------------------------------------------------------------------------|------|------|------|------|------|------|------|------|------|------|
| 26_Femoroacetabular impingement (FAI) Syndrome with cam morphology is the preferred term to use for hip-related pain due to a bony bump at any location around the femoral head-neck junction       | .276 | .077 | .250 | .009 | .028 | .003 | .063 | .021 | .271 | .119 |
| 27_Femoroacetabular impingement (FAI) Syndrome with cam deformity is the preferred term to use for hip-related pain due                                                                             | .183 | .227 | .018 | .010 | .255 | .155 | .174 | .009 | .270 | .129 |
| 28_Femoroacetabular impingement (FAI) Syndrome with cam abnormality is the preferred term to use for hip-related pain due to a bony bump at any location around the femoral head-neck junction      | .386 | .268 | .081 | .030 | .704 | .275 | .295 | .009 | .889 | .522 |
| 29_Femoroacetabular impingement (FAI) Syndrome with cam lesion is the preferred term to use for hip-related pain due to a bony bump at any location around the femoral head-neck junction           | .667 | .512 | .052 | .006 | .658 | .159 | .295 | .009 | .963 | .445 |
| 30_Femoroacetabular impingement (FAI) Syndrome with cam-type abnormality is the preferred term to use for hip-related pain due to a bony bump at any location around the femoral head-neck junction | .756 | .913 | .129 | .022 | .705 | .312 | .296 | .009 | .963 | .639 |
| 31_Femoroacetabular impingement (FAI) Syndrome with cam-type deformity is the preferred term to use                                                                                                 | .507 | .660 | .041 | .006 | .468 | .312 | .210 | .009 | .614 | .525 |

for hip-related pain due to a bony bump at any location around the femoral head-neck junction

**Table SF7-8** Kruskal-Wallis test to compare Patient & Public Involvement Group (PPI) vs other stakeholder groups (p-values)

| Statement                                                                                                                          | PPI vs Orthopaedic surgeons |         | PPI vs physical therapists |         | PPI vs physicians |         | PPI vs radiologists |         | PPI vs researchers |         |
|------------------------------------------------------------------------------------------------------------------------------------|-----------------------------|---------|----------------------------|---------|-------------------|---------|---------------------|---------|--------------------|---------|
|                                                                                                                                    | Round 1                     | Round 2 | Round 1                    | Round 2 | Round 1           | Round 2 | Round 1             | Round 2 | Round 1            | Round 2 |
| 13_Cam morphology is the preferred term to use for a bone/cartilage bump at any location around the femoral head-neck junction     | .022                        | .004    | .507                       | .673    | .835              | .514    | 1.000               | .853    | .342               | .037    |
| 14_Cam lesion is the preferred term to use for a bone/cartilage bump at any location around the femoral head-neck junction         | .969                        | .797    | .126                       | .022    | .538              | .347    | .480                | .230    | .869               | .539    |
| 15_Cam deformity is the preferred term to use for a bone/cartilage bump at any location around the femoral head-neck junction      | .248                        | .350    | .161                       | .093    | .345              | .246    | .418                | .011    | .665               | .290    |
| 16_Cam abnormality is the preferred term to use for a bone/cartilage bump at any location around the femoral head-neck junction    | .401                        | .388    | .616                       | .472    | .937              | .770    | .231                | .087    | .372               | .317    |
| 17_Cam-type deformity is the preferred term to use for a bone/cartilage bump at any location around the femoral head-neck junction | .576                        | .512    | .449                       | .208    | .787              | .408    | .561                | .024    | .224               | .610    |
| 18_Cam-type abnormality is the preferred term to use for a bone/cartilage bump at any location                                     | .515                        | .369    | .837                       | .352    | .817              | .743    | .738                | .087    | .537               | .732    |

|                                                                                                                                                                      |      |      |      |      |       |      |      |      |      |      |
|----------------------------------------------------------------------------------------------------------------------------------------------------------------------|------|------|------|------|-------|------|------|------|------|------|
| around the femoral head-neck junction                                                                                                                                |      |      |      |      |       |      |      |      |      |      |
| 19_Cam-type lesion is the preferred term to use for a bone/cartilage bump at any location around the femoral head-neck junction                                      | .496 | .399 | .416 | .170 | .723  | .503 | .205 | .048 | .441 | .962 |
| 20_Pistol grip deformity is the preferred term to use for a bone/cartilage bump at any location around the femoral head-neck junction                                | .858 | .507 | .829 | .972 | 1.000 | .814 | .462 | .258 | .159 | .555 |
| 21_Pistol grip lesion is the preferred term to use for a bone/cartilage bump at any location around the femoral head-neck junction                                   | .929 | .741 | .829 | .972 | .966  | .814 | .833 | .258 | .158 | .598 |
| 22_Pistol grip abnormality is the preferred term to use for a bone/cartilage bump at any location around the femoral head-neck junction                              | .858 | .536 | .781 | .739 | .597  | .814 | .888 | .750 | .158 | .331 |
| 23_Cam-type impingement is the preferred term to use for hip-related pain due to a bony bump at any location around the femoral head-neck junction                   | .106 | .369 | .091 | .171 | .512  | .706 | .326 | .104 | .046 | .459 |
| 24_Cam femoroacetabular impingement (FAI) is the preferred term to use for hip-related pain due to a bony bump at any location around the femoral head-neck junction | .416 | .353 | .029 | .019 | .242  | .376 | .206 | .017 | .052 | .236 |
| 25_Cam-type femoroacetabular impingement (FAI) is the preferred term to use for hip-related pain due to                                                              | .638 | .665 | .302 | .243 | .185  | .241 | .507 | .178 | .667 | .428 |

a bony bump at any location around the femoral head-neck junction

|                                                                                                                                                                                                     |      |      |      |      |      |      |      |      |      |       |
|-----------------------------------------------------------------------------------------------------------------------------------------------------------------------------------------------------|------|------|------|------|------|------|------|------|------|-------|
| 26_Femoroacetabular impingement (FAI) Syndrome with cam morphology is the preferred term to use for hip-related pain due to a bony bump at any location around the femoral head-neck junction       | .276 | .077 | .934 | .592 | .133 | .168 | .261 | .382 | .626 | .879  |
| 27_Femoroacetabular impingement (FAI) Syndrome with cam deformity is the preferred term to use for hip-related pain due                                                                             | .183 | .227 | .175 | .192 | .940 | .762 | .477 | .047 | .869 | .674  |
| 28_Femoroacetabular impingement (FAI) Syndrome with cam abnormality is the preferred term to use for hip-related pain due to a bony bump at any location around the femoral head-neck junction      | .386 | .268 | .509 | .486 | .623 | .837 | .739 | .086 | .542 | .695  |
| 29_Femoroacetabular impingement (FAI) Syndrome with cam lesion is the preferred term to use for hip-related pain due to a bony bump at any location around the femoral head-neck junction           | .667 | .512 | .125 | .081 | .882 | .537 | .480 | .047 | .829 | .888  |
| 30_Femoroacetabular impingement (FAI) Syndrome with cam-type abnormality is the preferred term to use for hip-related pain due to a bony bump at any location around the femoral head-neck junction | .756 | .913 | .236 | .040 | .971 | .373 | .418 | .012 | .871 | .712  |
| 31_Femoroacetabular impingement (FAI) Syndrome with cam-type deformity is the preferred term to use                                                                                                 | .507 | .660 | .186 | .092 | .911 | .655 | .442 | .048 | .957 | 1.000 |

for hip-related pain due to a bony bump at any location around the femoral head-neck junction

**Table SF7-9** Kruskal-Wallis test to compare Physical Therapists vs other stakeholder groups

| Statement                                                                                                                          | Physical Therapists vs Orthopaedic surgeons |         | Physical therapists vs PPI |         | Physical Therapists vs physicians |         | Physical Therapists vs radiologists |         | Physical Therapists vs researchers |         |
|------------------------------------------------------------------------------------------------------------------------------------|---------------------------------------------|---------|----------------------------|---------|-----------------------------------|---------|-------------------------------------|---------|------------------------------------|---------|
|                                                                                                                                    | Round 1                                     | Round 2 | Round 1                    | Round 2 | Round 1                           | Round 2 | Round 1                             | Round 2 | Round 1                            | Round 2 |
| 13_Cam morphology is the preferred term to use for a bone/cartilage bump at any location around the femoral head-neck junction     | .005                                        | .001    | .507                       | .673    | .339                              | .251    | .450                                | .532    | .075                               | .012    |
| 14_Cam lesion is the preferred term to use for a bone/cartilage bump at any location around the femoral head-neck junction         | .030                                        | .014    | .126                       | .022    | .619                              | .277    | .968                                | .884    | .013                               | .000    |
| 15_Cam deformity is the preferred term to use for a bone/cartilage bump at any location around the femoral head-neck junction      | .003                                        | .028    | .161                       | .093    | .770                              | .849    | .907                                | .069    | .045                               | .010    |
| 16_Cam abnormality is the preferred term to use for a bone/cartilage bump at any location around the femoral head-neck junction    | .110                                        | .059    | .616                       | .472    | .789                              | .737    | .263                                | .145    | .113                               | .070    |
| 17_Cam-type deformity is the preferred term to use for a bone/cartilage bump at any location around the femoral head-neck junction | .216                                        | .099    | .449                       | .208    | .789                              | .981    | .907                                | .069    | .027                               | .065    |
| 18_Cam-type abnormality is the preferred term to use for a                                                                         | .434                                        | .035    | .837                       | .352    | .666                              | .679    | .756                                | .144    | .265                               | .172    |

|                                                                                                                                                                      |      |      |      |      |      |       |      |      |      |      |
|----------------------------------------------------------------------------------------------------------------------------------------------------------------------|------|------|------|------|------|-------|------|------|------|------|
| bone/cartilage bump at any location around the femoral head-neck junction                                                                                            |      |      |      |      |      |       |      |      |      |      |
| 19_Cam-type lesion is the preferred term to use for a bone/cartilage bump at any location around the femoral head-neck junction                                      | .069 | .007 | .416 | .170 | .673 | .679  | .320 | .144 | .028 | .172 |
| 20_Pistol grip deformity is the preferred term to use for a bone/cartilage bump at any location around the femoral head-neck junction                                | .957 | .329 | .829 | .972 | .899 | .742  | .436 | .203 | .069 | .558 |
| 21_Pistol grip lesion is the preferred term to use for a bone/cartilage bump at any location around the femoral head-neck junction                                   | .830 | .687 | .829 | .972 | .899 | .742  | .968 | .203 | .074 | .558 |
| 22_Pistol grip abnormality is the preferred term to use for a bone/cartilage bump at any location around the femoral head-neck junction                              | .915 | .239 | .781 | .739 | .728 | 1.000 | .689 | .915 | .103 | .143 |
| 23_Cam-type impingement is the preferred term to use for hip-related pain due to a bony bump at any location around the femoral head-neck junction                   | .006 | .022 | .091 | .171 | .089 | .331  | .759 | .389 | .003 | .033 |
| 24_Cam femoroacetabular impingement (FAI) is the preferred term to use for hip-related pain due to a bony bump at any location around the femoral head-neck junction | .463 | .611 | .029 | .019 | .489 | .183  | .825 | .109 | .000 | .001 |
| 25_Cam-type femoroacetabular impingement (FAI) is the preferred                                                                                                      | .789 | .628 | .302 | .243 | .853 | .730  | .913 | .441 | .191 | .672 |

term to use for hip-related pain due to a bony bump at any location around the femoral head-neck junction

|                                                                                                                                                                                                     |      |      |      |      |      |      |      |      |      |      |
|-----------------------------------------------------------------------------------------------------------------------------------------------------------------------------------------------------|------|------|------|------|------|------|------|------|------|------|
| 26_Femoroacetabular impingement (FAI) Syndrome with cam morphology is the preferred term to use for hip-related pain due to a bony bump at any location around the femoral head-neck junction       | .250 | .009 | .934 | .592 | .104 | .328 | .124 | .569 | .974 | .349 |
| 27_Femoroacetabular impingement (FAI) Syndrome with cam deformity is the preferred term to use for hip-related pain due                                                                             | .018 | .010 | .175 | .192 | .180 | .308 | .968 | .101 | .138 | .217 |
| 28_Femoroacetabular impingement (FAI) Syndrome with cam abnormality is the preferred term to use for hip-related pain due to a bony bump at any location around the femoral head-neck junction      | .081 | .030 | .509 | .486 | .180 | .433 | .968 | .102 | .183 | .306 |
| 29_Femoroacetabular impingement (FAI) Syndrome with cam lesion is the preferred term to use for hip-related pain due to a bony bump at any location around the femoral head-neck junction           | .052 | .006 | .125 | .081 | .144 | .378 | .901 | .142 | .048 | .045 |
| 30_Femoroacetabular impingement (FAI) Syndrome with cam-type abnormality is the preferred term to use for hip-related pain due to a bony bump at any location around the femoral head-neck junction | .129 | .022 | .236 | .040 | .261 | .451 | .905 | .101 | .232 | .261 |
| 31_Femoroacetabular impingement (FAI) Syndrome with cam-type                                                                                                                                        | .041 | .006 | .186 | .092 | .196 | .282 | .968 | .144 | .064 | .054 |

deformity is the preferred term to use for hip-related pain due to a bony bump at any location around the femoral head-neck junction

**Table SF7-10** Kruskal-Wallis test to compare Physicians vs other stakeholder groups (p-values)

| Statement                                                                                                                          | Physicians vs Orthopaedic surgeons |         | Physicians vs PPI |         | Physicians vs Physical Therapists |         | Physicians vs radiologists |         | Physicians vs researchers |         |
|------------------------------------------------------------------------------------------------------------------------------------|------------------------------------|---------|-------------------|---------|-----------------------------------|---------|----------------------------|---------|---------------------------|---------|
|                                                                                                                                    | Round 1                            | Round 2 | Round 1           | Round 2 | Round 1                           | Round 2 | Round 1                    | Round 2 | Round 1                   | Round 2 |
| 13_Cam morphology is the preferred term to use for a bone/cartilage bump at any location around the femoral head-neck junction     | .025                               | .004    | .835              | .514    | .339                              | .251    | .884                       | .663    | .413                      | .089    |
| 14_Cam lesion is the preferred term to use for a bone/cartilage bump at any location around the femoral head-neck junction         | .287                               | .291    | .538              | .347    | .619                              | .277    | .873                       | .523    | .231                      | .045    |
| 15_Cam deformity is the preferred term to use for a bone/cartilage bump at any location around the femoral head-neck junction      | .042                               | .119    | .345              | .246    | .770                              | .849    | .873                       | .089    | .171                      | .062    |
| 16_Cam abnormality is the preferred term to use for a bone/cartilage bump at any location around the femoral head-neck junction    | .327                               | .228    | .937              | .770    | .789                              | .737    | .264                       | .140    | .282                      | .227    |
| 17_Cam-type deformity is the preferred term to use for a bone/cartilage bump at any location around the femoral head-neck junction | .464                               | .195    | .787              | .408    | .789                              | .981    | .709                       | .140    | .200                      | .207    |



|                                                                                                                                                                      |      |      |       |      |      |       |      |      |      |      |
|----------------------------------------------------------------------------------------------------------------------------------------------------------------------|------|------|-------|------|------|-------|------|------|------|------|
| 18_Cam-type abnormality is the preferred term to use for a bone/cartilage bump at any location around the femoral head-neck junction                                 | .695 | .205 | .817  | .743 | .666 | .679  | .571 | .140 | .564 | .455 |
| 19_Cam-type lesion is the preferred term to use for a bone/cartilage bump at any location around the femoral head-neck junction                                      | .253 | .119 | .723  | .503 | .673 | .679  | .264 | .140 | .158 | .506 |
| 20_Pistol grip deformity is the preferred term to use for a bone/cartilage bump at any location around the femoral head-neck junction                                | .913 | .321 | 1.000 | .814 | .899 | .742  | .455 | .324 | .110 | .428 |
| 21_Pistol grip lesion is the preferred term to use for a bone/cartilage bump at any location around the femoral head-neck junction                                   | .971 | .568 | .966  | .814 | .899 | .742  | .867 | .324 | .148 | .496 |
| 22_Pistol grip abnormality is the preferred term to use for a bone/cartilage bump at any location around the femoral head-neck junction                              | .726 | .341 | .597  | .814 | .728 | 1.000 | .522 | .945 | .366 | .231 |
| 23_Cam-type impingement is the preferred term to use for hip-related pain due to a bony bump at any location around the femoral head-neck junction                   | .247 | .217 | .512  | .706 | .089 | .331  | .265 | .156 | .213 | .351 |
| 24_Cam femoroacetabular impingement (FAI) is the preferred term to use for hip-related pain due to a bony bump at any location around the femoral head-neck junction | .610 | .953 | .242  | .376 | .489 | .183  | .731 | .036 | .003 | .023 |

|                                                                                                                                                                                                     |      |      |      |      |      |      |      |      |       |      |
|-----------------------------------------------------------------------------------------------------------------------------------------------------------------------------------------------------|------|------|------|------|------|------|------|------|-------|------|
| 25_Cam-type femoroacetabular impingement (FAI) is the preferred term to use for hip-related pain due to a bony bump at any location around the femoral head-neck junction                           | .545 | .658 | .185 | .241 | .853 | .730 | .961 | .366 | .275  | .777 |
| 26_Femoroacetabular impingement (FAI) Syndrome with cam morphology is the preferred term to use for hip-related pain due to a bony bump at any location around the femoral head-neck junction       | .028 | .003 | .133 | .168 | .104 | .328 | .883 | .760 | .179  | .098 |
| 27_Femoroacetabular impingement (FAI) Syndrome with cam deformity is the preferred term to use for hip-related pain due                                                                             | .255 | .155 | .940 | .762 | .180 | .308 | .451 | .055 | 1.000 | .908 |
| 28_Femoroacetabular impingement (FAI) Syndrome with cam abnormality is the preferred term to use for hip-related pain due to a bony bump at any location around the femoral head-neck junction      | .704 | .275 | .623 | .837 | .180 | .433 | .482 | .055 | .862  | .783 |
| 29_Femoroacetabular impingement (FAI) Syndrome with cam lesion is the preferred term to use for hip-related pain due to a bony bump at any location around the femoral head-neck junction           | .658 | .159 | .882 | .537 | .144 | .378 | .452 | .089 | .729  | .409 |
| 30_Femoroacetabular impingement (FAI) Syndrome with cam-type abnormality is the preferred term to use for hip-related pain due to a bony bump at any location around the femoral head-neck junction | .705 | .312 | .971 | .373 | .261 | .451 | .482 | .088 | .828  | .658 |

|                                                                                                                                                                                                   |      |      |      |      |      |      |      |      |      |      |
|---------------------------------------------------------------------------------------------------------------------------------------------------------------------------------------------------|------|------|------|------|------|------|------|------|------|------|
| 31_Femoroacetabular impingement (FAI) Syndrome with cam-type deformity is the preferred term to use for hip-related pain due to a bony bump at any location around the femoral head-neck junction | .468 | .312 | .911 | .655 | .196 | .282 | .421 | .089 | .729 | .555 |
|---------------------------------------------------------------------------------------------------------------------------------------------------------------------------------------------------|------|------|------|------|------|------|------|------|------|------|

**Table SF7-11** Kruskal-Wallis test to compare Radiologists vs other stakeholder groups (p-values)

| Statement                                                                                                                       | Radiologists vs Orthopaedic surgeons |         | Radiologists vs PPI |         | Radiologists vs Physical Therapists |         | Radiologists vs Physicians |         | Radiologists vs Researchers |         |
|---------------------------------------------------------------------------------------------------------------------------------|--------------------------------------|---------|---------------------|---------|-------------------------------------|---------|----------------------------|---------|-----------------------------|---------|
|                                                                                                                                 | Round 1                              | Round 2 | Round 1             | Round 2 | Round 1                             | Round 2 | Round 1                    | Round 2 | Round 1                     | Round 2 |
| 13_Cam morphology is the preferred term to use for a bone/cartilage bump at any location around the femoral head-neck junction  | .044                                 | .014    | 1.000               | .853    | .450                                | .532    | .884                       | .663    | .335                        | .059    |
| 14_Cam lesion is the preferred term to use for a bone/cartilage bump at any location around the femoral head-neck junction      | .271                                 | .190    | .480                | .230    | .968                                | .884    | .873                       | .523    | .172                        | .058    |
| 15_Cam deformity is the preferred term to use for a bone/cartilage bump at any location around the femoral head-neck junction   | .100                                 | .009    | .418                | .011    | .907                                | .069    | .873                       | .089    | .236                        | .004    |
| 16_Cam abnormality is the preferred term to use for a bone/cartilage bump at any location around the femoral head-neck junction | .064                                 | .018    | .231                | .087    | .263                                | .145    | .264                       | .140    | .061                        | .024    |
| 17_Cam-type deformity is the preferred term to use for a bone/cartilage bump at any location                                    | .301                                 | .018    | .561                | .024    | .907                                | .069    | .709                       | .140    | .157                        | .010    |

around the femoral head-neck junction

|                                                                                                                                                    |      |      |      |      |      |      |      |      |      |      |
|----------------------------------------------------------------------------------------------------------------------------------------------------|------|------|------|------|------|------|------|------|------|------|
| 18_Cam-type abnormality is the preferred term to use for a bone/cartilage bump at any location around the femoral head-neck junction               | .383 | .018 | .738 | .087 | .756 | .144 | .571 | .140 | .321 | .052 |
| 19_Cam-type lesion is the preferred term to use for a bone/cartilage bump at any location around the femoral head-neck junction                    | .057 | .008 | .205 | .048 | .320 | .144 | .264 | .140 | .022 | .052 |
| 20_Pistol grip deformity is the preferred term to use for a bone/cartilage bump at any location around the femoral head-neck junction              | .533 | .105 | .462 | .258 | .436 | .203 | .455 | .324 | .451 | .173 |
| 21_Pistol grip lesion is the preferred term to use for a bone/cartilage bump at any location around the femoral head-neck junction                 | .906 | .174 | .833 | .258 | .968 | .203 | .867 | .324 | .345 | .171 |
| 22_Pistol grip abnormality is the preferred term to use for a bone/cartilage bump at any location around the femoral head-neck junction            | .768 | .348 | .888 | .750 | .689 | .915 | .522 | .945 | .103 | .255 |
| 23_Cam-type impingement is the preferred term to use for hip-related pain due to a bony bump at any location around the femoral head-neck junction | .058 | .033 | .326 | .104 | .759 | .389 | .265 | .156 | .029 | .038 |
| 24_Cam femoroacetabular impingement (FAI) is the preferred term to use for hip-related pain due to                                                 | .675 | .081 | .206 | .017 | .825 | .109 | .731 | .036 | .011 | .003 |

|                                                                                                                                                                                                |      |      |      |      |      |      |      |      |      |      |
|------------------------------------------------------------------------------------------------------------------------------------------------------------------------------------------------|------|------|------|------|------|------|------|------|------|------|
| a bony bump at any location around the femoral head-neck junction                                                                                                                              |      |      |      |      |      |      |      |      |      |      |
| 25_Cam-type femoroacetabular impingement (FAI) is the preferred term to use for hip-related pain due to a bony bump at any location around the femoral head-neck junction                      | .959 | .276 | .507 | .178 | .913 | .441 | .961 | .366 | .385 | .162 |
| 26_Femoroacetabular impingement (FAI) Syndrome with cam morphology is the preferred term to use for hip-related pain due to a bony bump at any location around the femoral head-neck junction  | .063 | .021 | .261 | .382 | .124 | .569 | .883 | .760 | .067 | .173 |
| 27_Femoroacetabular impingement (FAI) Syndrome with cam deformity is the preferred term to use for hip-related pain due                                                                        | .174 | .009 | .477 | .047 | .968 | .101 | .451 | .055 | .298 | .023 |
| 28_Femoroacetabular impingement (FAI) Syndrome with cam abnormality is the preferred term to use for hip-related pain due to a bony bump at any location around the femoral head-neck junction | .295 | .009 | .739 | .086 | .968 | .102 | .482 | .055 | .365 | .052 |
| 29_Femoroacetabular impingement (FAI) Syndrome with cam lesion is the preferred term to use for hip-related pain due to a bony bump at any location around the femoral head-neck junction      | .295 | .009 | .480 | .047 | .901 | .142 | .452 | .089 | .208 | .024 |
| 30_Femoroacetabular impingement (FAI) Syndrome with cam-type abnormality is the preferred term to use for hip-related pain due to a bony                                                       | .296 | .009 | .418 | .012 | .905 | .101 | .482 | .088 | .327 | .052 |

|                                                                                                                                                                                                   |      |      |      |      |      |      |      |      |      |      |
|---------------------------------------------------------------------------------------------------------------------------------------------------------------------------------------------------|------|------|------|------|------|------|------|------|------|------|
| bump at any location around the femoral head-neck junction                                                                                                                                        |      |      |      |      |      |      |      |      |      |      |
| 31_Femoroacetabular impingement (FAI) Syndrome with cam-type deformity is the preferred term to use for hip-related pain due to a bony bump at any location around the femoral head-neck junction | .210 | .009 | .442 | .048 | .968 | .144 | .421 | .089 | .208 | .023 |

**Table SF7-12** Kruskal-Wallis test to compare Researchers vs other stakeholder groups (p-values)

| Statement                                                                                                                       | Researchers vs Orthopaedic surgeons |         | Researchers vs PPI |         | Researchers vs Physical Therapists |         | Researchers vs Physicians |         | Researchers vs Radiologists |         |
|---------------------------------------------------------------------------------------------------------------------------------|-------------------------------------|---------|--------------------|---------|------------------------------------|---------|---------------------------|---------|-----------------------------|---------|
|                                                                                                                                 | Round 1                             | Round 2 | Round 1            | Round 2 | Round 1                            | Round 2 | Round 1                   | Round 2 | Round 1                     | Round 2 |
| 13_Cam morphology is the preferred term to use for a bone/cartilage bump at any location around the femoral head-neck junction  | .117                                | .065    | .342               | .037    | .075                               | .012    | .413                      | .089    | .335                        | .059    |
| 14_Cam lesion is the preferred term to use for a bone/cartilage bump at any location around the femoral head-neck junction      | .925                                | .637    | .869               | .539    | .013                               | .000    | .231                      | .045    | .172                        | .058    |
| 15_Cam deformity is the preferred term to use for a bone/cartilage bump at any location around the femoral head-neck junction   | .337                                | .967    | .665               | .290    | .045                               | .010    | .171                      | .062    | .236                        | .004    |
| 16_Cam abnormality is the preferred term to use for a bone/cartilage bump at any location around the femoral head-neck junction | .853                                | .764    | .372               | .317    | .113                               | .070    | .282                      | .227    | .061                        | .024    |
| 17_Cam-type deformity is the preferred term to use for a                                                                        | .781                                | .832    | .224               | .610    | .027                               | .065    | .200                      | .207    | .157                        | .010    |

|                                                                                                                                                    |      |      |      |      |      |      |      |      |      |      |
|----------------------------------------------------------------------------------------------------------------------------------------------------|------|------|------|------|------|------|------|------|------|------|
| bone/cartilage bump at any location around the femoral head-neck junction                                                                          |      |      |      |      |      |      |      |      |      |      |
| 18_Cam-type abnormality is the preferred term to use for a bone/cartilage bump at any location around the femoral head-neck junction               | .814 | .698 | .537 | .732 | .265 | .172 | .564 | .455 | .321 | .052 |
| 19_Cam-type lesion is the preferred term to use for a bone/cartilage bump at any location around the femoral head-neck junction                    | .926 | .437 | .441 | .962 | .028 | .172 | .158 | .506 | .022 | .052 |
| 20_Pistol grip deformity is the preferred term to use for a bone/cartilage bump at any location around the femoral head-neck junction              | .156 | .957 | .159 | .555 | .069 | .558 | .110 | .428 | .451 | .173 |
| 21_Pistol grip lesion is the preferred term to use for a bone/cartilage bump at any location around the femoral head-neck junction                 | .141 | .863 | .158 | .598 | .074 | .558 | .148 | .496 | .345 | .171 |
| 22_Pistol grip abnormality is the preferred term to use for a bone/cartilage bump at any location around the femoral head-neck junction            | .156 | .641 | .158 | .331 | .103 | .143 | .366 | .231 | .103 | .255 |
| 23_Cam-type impingement is the preferred term to use for hip-related pain due to a bony bump at any location around the femoral head-neck junction | .713 | .646 | .046 | .459 | .003 | .033 | .213 | .351 | .029 | .038 |
| 24_Cam femoroacetabular impingement (FAI) is the preferred                                                                                         | .019 | .081 | .052 | .236 | .000 | .001 | .003 | .023 | .011 | .003 |

|                                                                                                                                                                                                |      |      |      |      |      |      |       |      |      |      |
|------------------------------------------------------------------------------------------------------------------------------------------------------------------------------------------------|------|------|------|------|------|------|-------|------|------|------|
| term to use for hip-related pain due to a bony bump at any location around the femoral head-neck junction                                                                                      |      |      |      |      |      |      |       |      |      |      |
| 25_Cam-type femoroacetabular impingement (FAI) is the preferred term to use for hip-related pain due to a bony bump at any location around the femoral head-neck junction                      | .613 | .890 | .667 | .428 | .191 | .672 | .275  | .777 | .385 | .162 |
| 26_Femoroacetabular impingement (FAI) Syndrome with cam morphology is the preferred term to use for hip-related pain due to a bony bump at any location around the femoral head-neck junction  | .271 | .119 | .626 | .879 | .974 | .349 | .179  | .098 | .067 | .173 |
| 27_Femoroacetabular impingement (FAI) Syndrome with cam deformity is the preferred term to use for hip-related pain due                                                                        | .270 | .129 | .869 | .674 | .138 | .217 | 1.000 | .908 | .298 | .023 |
| 28_Femoroacetabular impingement (FAI) Syndrome with cam abnormality is the preferred term to use for hip-related pain due to a bony bump at any location around the femoral head-neck junction | .889 | .522 | .542 | .695 | .183 | .306 | .862  | .783 | .365 | .052 |
| 29_Femoroacetabular impingement (FAI) Syndrome with cam lesion is the preferred term to use for hip-related pain due to a bony bump at any location around the femoral head-neck junction      | .963 | .445 | .829 | .888 | .048 | .045 | .729  | .409 | .208 | .024 |
| 30_Femoroacetabular impingement (FAI) Syndrome with cam-type abnormality is the preferred term to                                                                                              | .963 | .639 | .871 | .712 | .232 | .261 | .828  | .658 | .327 | .052 |



|                                                                                                                                                                                                   |      |      |      |       |      |      |      |      |      |      |
|---------------------------------------------------------------------------------------------------------------------------------------------------------------------------------------------------|------|------|------|-------|------|------|------|------|------|------|
| use for hip-related pain due to a bony bump at any location around the femoral head-neck junction                                                                                                 |      |      |      |       |      |      |      |      |      |      |
| 31_Femoroacetabular impingement (FAI) Syndrome with cam-type deformity is the preferred term to use for hip-related pain due to a bony bump at any location around the femoral head-neck junction | .614 | .525 | .957 | 1.000 | .064 | .054 | .729 | .555 | .208 | .023 |

### Taxonomy - Delphi domain 3

Stakeholder group analysis indicated the average scores for taxonomy statement 32 were statistically significant different for PPI group compared to the: (1) Orthopaedic Surgeon stakeholder group (round 2,  $p < 0.005$ ); (2) Physical Therapist stakeholder group (round 1 and 2,  $p < 0.002$ ); (3) Radiologist stakeholder group (round 1,  $p < 0.003$ ; round 2,  $p < 0.002$ ), and (4) Researcher stakeholder group (round 2,  $p < 0.002$ ). The difference in how the PPI stakeholder group compared to the Physical Therapist stakeholder group scored statement 34, was statistically significant (round 1,  $p < 0.005$ ; round 2,  $p < 0.003$ ).

**Table SF7-13** Kruskal-Wallis test to compare Orthopaedic Surgeons vs other stakeholder groups (p-values)

| Statement                                                                                                                                 | Orthopaedic surgeons vs PPI |         | Orthopaedic surgeons vs physical therapists |         | Orthopaedic surgeons vs physicians |         | Orthopaedic surgeons vs radiologists |         | Orthopaedic surgeons vs researchers |         |
|-------------------------------------------------------------------------------------------------------------------------------------------|-----------------------------|---------|---------------------------------------------|---------|------------------------------------|---------|--------------------------------------|---------|-------------------------------------|---------|
|                                                                                                                                           | Round 1                     | Round 2 | Round 1                                     | Round 2 | Round 1                            | Round 2 | Round 1                              | Round 2 | Round 1                             | Round 2 |
| 32_We should distinguish between primary and secondary cam morphology in clinical practice                                                | .011                        | .003    | .847                                        | .772    | .526                               | .293    | .918                                 | .469    | .564                                | .326    |
| 33_We should distinguish between primary and secondary cam morphology in research                                                         | .637                        | .144    | .509                                        | .590    | .346                               | 1.000   | .516                                 | 1.000   | .325                                | .473    |
| 34_We should distinguish between primary and secondary cam morphology in patients with femoroacetabular impingement syndrome              | .030                        | .007    | .829                                        | .631    | .324                               | .222    | .325                                 | .227    | .721                                | .854    |
| 35_We should distinguish between primary and secondary cam morphology in research participants with femoroacetabular impingement syndrome | .178                        | .032    | .810                                        | .250    | .922                               | .351    | .955                                 | .336    | .450                                | .698    |

**Table SF7-14** Kruskal Wallis test to compare Patient & Public Involvement Group (PPI) vs other stakeholder groups

| Statement                                                                                  | PPI vs Orthopaedic surgeons |         | PPI vs physical therapists |         | PPI vs physicians |         | PPI vs radiologists |         | PPI vs researchers |         |
|--------------------------------------------------------------------------------------------|-----------------------------|---------|----------------------------|---------|-------------------|---------|---------------------|---------|--------------------|---------|
|                                                                                            | Round 1                     | Round 2 | Round 1                    | Round 2 | Round 1           | Round 2 | Round 1             | Round 2 | Round 1            | Round 2 |
| 32_We should distinguish between primary and secondary cam morphology in clinical practice | .011                        | .003    | .001                       | .001    | .005              | .003    | .002                | .001    | .006               | .001    |

|                                                                                                                                           |      |      |      |      |      |      |      |      |      |      |
|-------------------------------------------------------------------------------------------------------------------------------------------|------|------|------|------|------|------|------|------|------|------|
| 33_We should distinguish between primary and secondary cam morphology in research                                                         | .637 | .144 | .279 | .255 | .156 | .084 | .290 | .133 | .219 | .017 |
| 34_We should distinguish between primary and secondary cam morphology in patients with femoroacetabular impingement syndrome              | .030 | .007 | .003 | .002 | .031 | .012 | .122 | .017 | .024 | .004 |
| 35_We should distinguish between primary and secondary cam morphology in research participants with femoroacetabular impingement syndrome | .178 | .032 | .114 | .161 | .089 | .086 | .150 | .133 | .025 | .016 |

**Table SF7-15** Kruskal-Wallis test to compare Physical Therapists vs other stakeholder groups (p-values)

| Statement                                                                                                                                 | Physical Therapists vs Orthopaedic surgeons |         | Physical therapists vs PPI |         | Physical Therapists vs physicians |         | Physical Therapists vs radiologists |         | Physical Therapists vs researchers |         |
|-------------------------------------------------------------------------------------------------------------------------------------------|---------------------------------------------|---------|----------------------------|---------|-----------------------------------|---------|-------------------------------------|---------|------------------------------------|---------|
|                                                                                                                                           | Round 1                                     | Round 2 | Round 1                    | Round 2 | Round 1                           | Round 2 | Round 1                             | Round 2 | Round 1                            | Round 2 |
| 32_We should distinguish between primary and secondary cam morphology in clinical practice                                                | .847                                        | .772    | .001                       | .001    | .175                              | .299    | .695                                | .446    | .123                               | .275    |
| 33_We should distinguish between primary and secondary cam morphology in research                                                         | .509                                        | .590    | .279                       | .255    | .714                              | .451    | .938                                | .619    | .899                               | .150    |
| 34_We should distinguish between primary and secondary cam morphology in patients with femoroacetabular impingement syndrome              | .829                                        | .631    | .003                       | .002    | .070                              | .242    | .070                                | .084    | .286                               | .948    |
| 35_We should distinguish between primary and secondary cam morphology in research participants with femoroacetabular impingement syndrome | .810                                        | .250    | .114                       | .161    | .981                              | .722    | .907                                | .904    | .553                               | .279    |

**Table SF7-16** Kruskal-Wallis test to compare Physicians vs other stakeholder groups (p-values)

| Statement                                                                                                                                 | Physicians vs Orthopaedic surgeons |         | Physicians vs PPI |         | Physicians vs Physical Therapists |         | Physicians vs radiologists |         | Physicians vs researchers |         |
|-------------------------------------------------------------------------------------------------------------------------------------------|------------------------------------|---------|-------------------|---------|-----------------------------------|---------|----------------------------|---------|---------------------------|---------|
|                                                                                                                                           | Round 1                            | Round 2 | Round 1           | Round 2 | Round 1                           | Round 2 | Round 1                    | Round 2 | Round 1                   | Round 2 |
| 32_We should distinguish between primary and secondary cam morphology in clinical practice                                                | .526                               | .293    | .005              | .003    | .175                              | .299    | .496                       | .852    | .646                      | .908    |
| 33_We should distinguish between primary and secondary cam morphology in research                                                         | .346                               | 1.000   | .156              | .084    | .714                              | .451    | .814                       | .665    | .668                      | .815    |
| 34_We should distinguish between primary and secondary cam morphology in patients with femoroacetabular impingement syndrome              | .324                               | .222    | .031              | .012    | .070                              | .242    | .580                       | .510    | .651                      | .349    |
| 35_We should distinguish between primary and secondary cam morphology in research participants with femoroacetabular impingement syndrome | .922                               | .351    | .089              | .086    | .981                              | .722    | .774                       | .772    | .729                      | .508    |

**Table SF7-17** Kruskal-Wallis test to compare Radiologists vs other stakeholder groups (p-values)

| Statement                                                                                                                    | Radiologists vs Orthopaedic surgeons |         | Radiologists vs PPI |         | Radiologists vs Physical Therapists |         | Radiologists vs Physicians |         | Radiologists vs Researchers |         |
|------------------------------------------------------------------------------------------------------------------------------|--------------------------------------|---------|---------------------|---------|-------------------------------------|---------|----------------------------|---------|-----------------------------|---------|
|                                                                                                                              | Round 1                              | Round 2 | Round 1             | Round 2 | Round 1                             | Round 2 | Round 1                    | Round 2 | Round 1                     | Round 2 |
| 32_We should distinguish between primary and secondary cam morphology in clinical practice                                   | .918                                 | .469    | .002                | .001    | .695                                | .446    | .496                       | .852    | .343                        | .705    |
| 33_We should distinguish between primary and secondary cam morphology in research                                            | .516                                 | 1.000   | .290                | .133    | .938                                | .619    | .814                       | .665    | .942                        | .352    |
| 34_We should distinguish between primary and secondary cam morphology in patients with femoroacetabular impingement syndrome | .325                                 | .227    | .122                | .017    | .070                                | .084    | .580                       | .510    | .315                        | .102    |

|                                                                                                                                           |      |      |      |      |      |      |      |      |      |      |
|-------------------------------------------------------------------------------------------------------------------------------------------|------|------|------|------|------|------|------|------|------|------|
| 35_We should distinguish between primary and secondary cam morphology in research participants with femoroacetabular impingement syndrome | .955 | .336 | .150 | .133 | .907 | .904 | .774 | .772 | .524 | .270 |
|-------------------------------------------------------------------------------------------------------------------------------------------|------|------|------|------|------|------|------|------|------|------|

**Table SF7-18** Kruskal-Wallis test to compare Researchers vs other stakeholder groups (p-values)

| Statement                                                                                                                                 | Researchers vs Orthopaedic surgeons |         | Researchers vs PPI |         | Researchers vs Physical Therapists |         | Researchers vs Physicians |         | Researchers vs Radiologists |         |
|-------------------------------------------------------------------------------------------------------------------------------------------|-------------------------------------|---------|--------------------|---------|------------------------------------|---------|---------------------------|---------|-----------------------------|---------|
|                                                                                                                                           | Round 1                             | Round 2 | Round 1            | Round 2 | Round 1                            | Round 2 | Round 1                   | Round 2 | Round 1                     | Round 2 |
| 32_We should distinguish between primary and secondary cam morphology in clinical practice                                                | .564                                | .326    | .006               | .001    | .123                               | .275    | .646                      | .908    | .343                        | .705    |
| 33_We should distinguish between primary and secondary cam morphology in research                                                         | .325                                | .473    | .219               | .017    | .899                               | .150    | .668                      | .815    | .942                        | .352    |
| 34_We should distinguish between primary and secondary cam morphology in patients with femoroacetabular impingement syndrome              | .721                                | .854    | .024               | .004    | .286                               | .948    | .651                      | .349    | .315                        | .102    |
| 35_We should distinguish between primary and secondary cam morphology in research participants with femoroacetabular impingement syndrome | .450                                | .698    | .025               | .016    | .553                               | .279    | .729                      | .508    | .524                        | .270    |

### Imaging outcomes – Delphi domain 4

There was no statistically significant difference in how stakeholder groups scored the imaging outcomes statements in round 1 and 2 (stakeholder group analysis).

**Table SF7-19** Kruskal-Wallis test to compare Orthopaedic Surgeons vs other stakeholder groups (p-values)

| Statement                                                                                                                                                                                                                                                                                                 | Orthopaedic surgeons vs PPI |         | Orthopaedic surgeons vs physical therapists |         | Orthopaedic surgeons vs physicians |         | Orthopaedic surgeons vs radiologists |         | Orthopaedic surgeons vs researchers |         |
|-----------------------------------------------------------------------------------------------------------------------------------------------------------------------------------------------------------------------------------------------------------------------------------------------------------|-----------------------------|---------|---------------------------------------------|---------|------------------------------------|---------|--------------------------------------|---------|-------------------------------------|---------|
|                                                                                                                                                                                                                                                                                                           | Round 1                     | Round 2 | Round 1                                     | Round 2 | Round 1                            | Round 2 | Round 1                              | Round 2 | Round 1                             | Round 2 |
| 36_The main imaging modality for research on how primary cam morphology develops should be magnetic resonance (MR) with radial imaging (1.5T or 3 T)                                                                                                                                                      | .958                        | .553    | 1.000                                       | .502    | .787                               | .305    | .713                                 | 1.000   | .490                                | .883    |
| 37_The minimum acceptable number of radial sequence magnetic resonance (MR) imaging slices for research on how primary cam morphology develops should be 12 slices (30° intervals, in all 12 clock face positions from 12 o'clock to 11 o'clock positions)                                                | .755                        | .390    | .656                                        | .426    | .749                               | .174    | .437                                 | .177    | .381                                | .208    |
| 38_Referring to precisely quantifying the asphericity of the femoral head-neck junction on radial sequence magnetic resonance (MR) imaging: use either radial sequences along the axis of the femoral neck (providing higher resolution images) or radial reconstructions from 3-dimensional acquisitions | .705                        | .944    | .133                                        | .251    | .441                               | .272    | .034                                 | .026    | .117                                | .142    |
| 39_The magnetic resonance (MR) imaging protocol for research on how primary cam morphology develops                                                                                                                                                                                                       | .388                        | .536    | .256                                        | .232    | .546                               | .394    | .082                                 | .171    | .731                                | .849    |

|                                                                                                                                                                                                                                                                                                                                                                                                                        |      |      |       |      |      |      |      |       |      |      |
|------------------------------------------------------------------------------------------------------------------------------------------------------------------------------------------------------------------------------------------------------------------------------------------------------------------------------------------------------------------------------------------------------------------------|------|------|-------|------|------|------|------|-------|------|------|
| should include: (i) unilateral small field-of-view (FOV) sequences and radial images of a randomly selected or both hips, as well as (ii) femoral torsion assessment (fast axial sequences of the distal knee—femoral condyles—and proximal femoral neck), and (iii) a fluid sensitive sequence covering the whole pelvis (in axial or coronal planes, to screen for soft-tissue and bone marrow edema beyond the hip) |      |      |       |      |      |      |      |       |      |      |
| 40_The magnetic resonance (MR) imaging for prospective research on how primary cam morphology develops should be repeated every 18 to 24 months                                                                                                                                                                                                                                                                        | .222 | .270 | .228  | .382 | .172 | .215 | .719 | .620  | .434 | .780 |
| 41_In primary cam morphology epidemiological research (e.g.; when regression is being used in aetiology or prognosis research), continuous imaging outcome measures (variables), like the alpha angle, should be kept continuous                                                                                                                                                                                       | .759 | .639 | .170  | .098 | .971 | .912 | .809 | .900  | .248 | .146 |
| 42_The cam morphology magnetic resonance (MR) imaging outcome measure for research on how primary cam morphology develops (aetiology), should be the alpha angle for bone and cartilage as a continuous variable, reported for all the o'clock locations around the femoral head-neck junction, regardless of the                                                                                                      | .909 | .960 | 1.000 | .773 | .679 | .865 | .956 | 1.000 | .543 | .920 |

symptomatic state of the research participant

|                                                                                                                                                                                                                                                                                                                      |      |      |      |      |      |      |      |      |      |      |
|----------------------------------------------------------------------------------------------------------------------------------------------------------------------------------------------------------------------------------------------------------------------------------------------------------------------|------|------|------|------|------|------|------|------|------|------|
| 43_ For research on how primary cam morphology develops it is important to quantify the epiphyseal morphology magnetic resonance (MR) imaging outcome measure using epiphyseal extension                                                                                                                             | .950 | .803 | .464 | .424 | .672 | .900 | .251 | .490 | .797 | .342 |
| 44_ For research on how primary cam morphology develops the epiphyseal morphology magnetic resonance (MR) imaging outcome measure should also be quantified using epiphyseal tilt                                                                                                                                    | .613 | .559 | .801 | .538 | .317 | .843 | .219 | .173 | .304 | .208 |
| 45_ The main imaging modality for longitudinal primary cam morphology prognosis research should be anteroposterior (AP) pelvis and Dunn 45° view radiographs repeated at least every 5 years                                                                                                                         | .104 | .086 | .314 | .268 | .189 | .129 | .150 | .150 | .202 | .202 |
| 46_ The radiographic imaging outcome measure for research on primary cam morphology prognosis should be the alpha angle as a continuous variable reported for anteroposterior (AP) pelvis and Dunn 45° view radiographs.                                                                                             | .130 | .076 | .170 | .053 | .588 | .474 | .093 | .102 | .216 | .173 |
| 47_ In addition to reporting alpha angles as continuous in studies on aetiology or prognosis, the following quantitative and qualitative imaging outcome measures, to categorise cam morphology, can be useful in research or clinical practice: (i) Alpha angle $\geq 60^\circ$ (preferred) (ii) Head-neck offset < | .236 | .332 | .439 | .816 | .681 | .723 | .118 | .248 | .150 | .102 |



8mm AND head-neck offset ratio  $\leq$  0.15 usually at the anterior (3 o'clock) location around the femoral head-neck junction (in addition to (i)); Osseous or cartilage convexity of the femoral head neck junction at any location (in addition to (i) and (ii))

**Table SF7-20** Kruskal-Wallis test to compare Patient & Public Involvement Group (PPI) vs other stakeholder groups

| Statement                                                                                                                                                                                                                                                  | PPI vs Orthopaedic surgeons |         | PPI vs physical therapists |         | PPI vs physicians |         | PPI vs radiologists |         | PPI vs researchers |         |
|------------------------------------------------------------------------------------------------------------------------------------------------------------------------------------------------------------------------------------------------------------|-----------------------------|---------|----------------------------|---------|-------------------|---------|---------------------|---------|--------------------|---------|
|                                                                                                                                                                                                                                                            | Round 1                     | Round 2 | Round 1                    | Round 2 | Round 1           | Round 2 | Round 1             | Round 2 | Round 1            | Round 2 |
| 36_The main imaging modality for research on how primary cam morphology develops should be magnetic resonance (MR) with radial imaging (1.5T or 3 T)                                                                                                       | .958                        | .553    | .733                       | .625    | .557              | .503    | .652                | .447    | .489               | .916    |
| 37_The minimum acceptable number of radial sequence magnetic resonance (MR) imaging slices for research on how primary cam morphology develops should be 12 slices (30° intervals, in all 12 clock face positions from 12 o'clock to 11 o'clock positions) | .755                        | .390    | 1.000                      | .820    | .940              | .588    | .456                | .407    | .439               | .502    |
| 38_Referring to precisely quantifying the asphericity of the femoral head-neck junction on radial sequence magnetic resonance (MR) imaging: use either radial sequences along the axis of the femoral neck (providing higher resolution images) or radial  | .705                        | .944    | .443                       | .256    | .714              | .318    | .081                | .020    | .139               | .105    |

reconstructions from 3-dimensional acquisitions

|                                                                                                                                                                                                                                                                                                                                                                                                                                                                                                                             |      |      |      |      |      |      |       |       |      |      |
|-----------------------------------------------------------------------------------------------------------------------------------------------------------------------------------------------------------------------------------------------------------------------------------------------------------------------------------------------------------------------------------------------------------------------------------------------------------------------------------------------------------------------------|------|------|------|------|------|------|-------|-------|------|------|
| 39_ The magnetic resonance (MR) imaging protocol for research on how primary cam morphology develops should include: (i) unilateral small field-of-view (FOV) sequences and radial images of a randomly selected or both hips, as well as (ii) femoral torsion assessment (fast axial sequences of the distal knee—femoral condyles—and proximal femoral neck), and (iii) a fluid sensitive sequence covering the whole pelvis (in axial or coronal planes, to screen for soft-tissue and bone marrow edema beyond the hip) | .388 | .536 | .725 | .614 | .508 | .877 | .433  | .443  | .637 | .539 |
| 40_ The magnetic resonance (MR) imaging for prospective research on how primary cam morphology develops should be repeated every 18 to 24 months                                                                                                                                                                                                                                                                                                                                                                            | .222 | .270 | .905 | .311 | .848 | .794 | .371  | .351  | .801 | .545 |
| 41_ In primary cam morphology epidemiological research (e.g.; when regression is being used in aetiology or prognosis research), continuous imaging outcome measures (variables), like the alpha angle, should be kept continuous                                                                                                                                                                                                                                                                                           | .759 | .639 | .285 | .196 | .772 | .379 | .675  | .622  | .332 | .207 |
| 42_ The cam morphology magnetic resonance (MR) imaging outcome measure for research on how primary cam morphology develops (aetiology),                                                                                                                                                                                                                                                                                                                                                                                     | .909 | .960 | .966 | .605 | .366 | .792 | 1.000 | 1.000 | .405 | .842 |

should be the alpha angle for bone and cartilage as a continuous variable, reported for all the o'clock locations around the femoral head-neck junction, regardless of the symptomatic state of the research participant

|                                                                                                                                                                                                                          |      |      |      |      |      |      |       |      |      |      |
|--------------------------------------------------------------------------------------------------------------------------------------------------------------------------------------------------------------------------|------|------|------|------|------|------|-------|------|------|------|
| 43_ For research on how primary cam morphology develops it is important to quantify the epiphyseal morphology magnetic resonance (MR) imaging outcome measure using epiphyseal extension                                 | .950 | .803 | .453 | .779 | .608 | .357 | .135  | .153 | .879 | .582 |
| 44_ For research on how primary cam morphology develops the epiphyseal morphology magnetic resonance (MR) imaging outcome measure should also be quantified using epiphyseal tilt                                        | .613 | .559 | .493 | .235 | .595 | .742 | .209  | .329 | .279 | .373 |
| 45_ The main imaging modality for longitudinal primary cam morphology prognosis research should be anteroposterior (AP) pelvis and Dunn 45° view radiographs repeated at least every 5 years                             | .104 | .086 | .479 | .313 | .586 | .533 | 1.000 | .868 | .667 | .562 |
| 46_ The radiographic imaging outcome measure for research on primary cam morphology prognosis should be the alpha angle as a continuous variable reported for anteroposterior (AP) pelvis and Dunn 45° view radiographs. | .130 | .076 | .776 | .831 | .455 | .179 | .707  | .869 | .636 | .566 |
| 47_ In addition to reporting alpha angles as continuous in studies on aetiology or prognosis, the following                                                                                                              | .236 | .332 | .120 | .114 | .330 | .170 | .735  | .788 | .041 | .031 |

quantitative and qualitative imaging outcome measures, to categorise cam morphology, can be useful in research or clinical practice: (i) Alpha angle  $\geq 60^\circ$  (preferred) (ii) Head-neck offset  $< 8\text{mm}$  AND head-neck offset ratio  $\leq 0.15$  usually at the anterior (3 o'clock) location around the femoral head-neck junction (in addition to (i)); Osseous or cartilage convexity of the femoral head neck junction at any location (in addition to (i) and (ii))

**Table SF7-21** Kruskal-Wallis test to compare Physical Therapists vs other stakeholder groups (-values)

| Statement                                                                                                                                                                                                                                                  | Physical Therapists vs Orthopaedic surgeons |         | Physical therapists vs PPI |         | Physical Therapists vs physicians |         | Physical Therapists vs radiologists |         | Physical Therapists vs researchers |         |
|------------------------------------------------------------------------------------------------------------------------------------------------------------------------------------------------------------------------------------------------------------|---------------------------------------------|---------|----------------------------|---------|-----------------------------------|---------|-------------------------------------|---------|------------------------------------|---------|
|                                                                                                                                                                                                                                                            | Round 1                                     | Round 2 | Round 1                    | Round 2 | Round 1                           | Round 2 | Round 1                             | Round 2 | Round 1                            | Round 2 |
| 36_The main imaging modality for research on how primary cam morphology develops should be magnetic resonance (MR) with radial imaging (1.5T or 3 T)                                                                                                       | 1.000                                       | .502    | .733                       | .625    | .841                              | .630    | .522                                | .319    | .348                               | .672    |
| 37_The minimum acceptable number of radial sequence magnetic resonance (MR) imaging slices for research on how primary cam morphology develops should be 12 slices (30° intervals, in all 12 clock face positions from 12 o'clock to 11 o'clock positions) | .656                                        | .426    | 1.000                      | .820    | .940                              | .365    | .784                                | .258    | .360                               | .364    |

|                                                                                                                                                                                                                                                                                                                                                                                                                                                                                                                             |      |      |      |      |      |      |      |      |      |      |
|-----------------------------------------------------------------------------------------------------------------------------------------------------------------------------------------------------------------------------------------------------------------------------------------------------------------------------------------------------------------------------------------------------------------------------------------------------------------------------------------------------------------------------|------|------|------|------|------|------|------|------|------|------|
| 38_ Referring to precisely quantifying the asphericity of the femoral head-neck junction on radial sequence magnetic resonance (MR) imaging: use either radial sequences along the axis of the femoral neck (providing higher resolution images) or radial reconstructions from 3-dimensional acquisitions                                                                                                                                                                                                                  | .133 | .251 | .443 | .256 | .711 | .975 | .289 | .210 | .423 | .419 |
| 39_ The magnetic resonance (MR) imaging protocol for research on how primary cam morphology develops should include: (i) unilateral small field-of-view (FOV) sequences and radial images of a randomly selected or both hips, as well as (ii) femoral torsion assessment (fast axial sequences of the distal knee—femoral condyles—and proximal femoral neck), and (iii) a fluid sensitive sequence covering the whole pelvis (in axial or coronal planes, to screen for soft-tissue and bone marrow edema beyond the hip) | .256 | .232 | .725 | .614 | .513 | .671 | .446 | .609 | .486 | .292 |
| 40_ The magnetic resonance (MR) imaging for prospective research on how primary cam morphology develops should be repeated every 18 to 24 months                                                                                                                                                                                                                                                                                                                                                                            | .228 | .382 | .905 | .311 | .862 | .372 | .543 | .823 | .752 | .968 |
| 41_ In primary cam morphology epidemiological research (e.g.; when regression is being used in aetiology or prognosis research), continuous                                                                                                                                                                                                                                                                                                                                                                                 | .170 | .098 | .285 | .196 | .187 | .117 | .177 | .181 | .908 | .936 |

|                                                                                                                                                                                                                                                                                                                                                                 |       |      |      |      |      |      |      |      |      |      |
|-----------------------------------------------------------------------------------------------------------------------------------------------------------------------------------------------------------------------------------------------------------------------------------------------------------------------------------------------------------------|-------|------|------|------|------|------|------|------|------|------|
| imaging outcome measures (variables), like the alpha angle, should be kept continuous                                                                                                                                                                                                                                                                           |       |      |      |      |      |      |      |      |      |      |
| 42_The cam morphology magnetic resonance (MR) imaging outcome measure for research on how primary cam morphology develops (aetiology), should be the alpha angle for bone and cartilage as a continuous variable, reported for all the o'clock locations around the femoral head-neck junction, regardless of the symptomatic state of the research participant | 1.000 | .773 | .966 | .605 | .471 | .448 | .966 | .682 | .490 | .854 |
| 43_For research on how primary cam morphology develops it is important to quantify the epiphyseal morphology magnetic resonance (MR) imaging outcome measure using epiphyseal extension                                                                                                                                                                         | .464  | .424 | .453 | .779 | .160 | .386 | .061 | .130 | .795 | .713 |
| 44_ For research on how primary cam morphology develops the epiphyseal morphology magnetic resonance (MR) imaging outcome measure should also be quantified using epiphyseal tilt                                                                                                                                                                               | .801  | .538 | .493 | .235 | .220 | .301 | .116 | .051 | .221 | .066 |
| 45_The main imaging modality for longitudinal primary cam morphology prognosis research should be anteroposterior (AP) pelvis and Dunn 45° view radiographs repeated at least every 5 years                                                                                                                                                                     | .314  | .268 | .479 | .313 | .760 | .715 | .420 | .395 | .801 | .734 |
| 46_The radiographic imaging outcome measure for research on primary cam                                                                                                                                                                                                                                                                                         | .170  | .053 | .776 | .831 | .540 | .185 | .525 | .735 | .833 | .701 |

morphology prognosis should be the alpha angle as a continuous variable reported for anteroposterior (AP) pelvis and Dunn 45° view radiographs.

|                                                                                                                                                                                                                                                                                                                                                                                                                                                                                                                                                                                        |      |      |      |      |      |      |      |      |      |      |
|----------------------------------------------------------------------------------------------------------------------------------------------------------------------------------------------------------------------------------------------------------------------------------------------------------------------------------------------------------------------------------------------------------------------------------------------------------------------------------------------------------------------------------------------------------------------------------------|------|------|------|------|------|------|------|------|------|------|
| 47_In addition to reporting alpha angles as continuous in studies on aetiology or prognosis, the following quantitative and qualitative imaging outcome measures, to categorise cam morphology, can be useful in research or clinical practice: (i) Alpha angle $\geq 60^\circ$ (preferred) (ii) Head-neck offset < 8mm AND head-neck offset ratio $\leq 0.15$ usually at the anterior (3 o'clock) location around the femoral head-neck junction (in addition to (i)); Osseous or cartilage convexity of the femoral head neck junction at any location (in addition to (i) and (ii)) | .439 | .816 | .120 | .114 | .197 | .370 | .054 | .074 | .584 | .066 |
|----------------------------------------------------------------------------------------------------------------------------------------------------------------------------------------------------------------------------------------------------------------------------------------------------------------------------------------------------------------------------------------------------------------------------------------------------------------------------------------------------------------------------------------------------------------------------------------|------|------|------|------|------|------|------|------|------|------|

**Table SF7-22** Kruskal-Wallis test to compare Physicians vs other stakeholder groups (p-values)

| Statement                                                                                                                                            | Physicians vs Orthopaedic surgeons |         | Physicians vs PPI |         | Physicians vs Physical Therapists |         | Physicians vs radiologists |         | Physicians vs researchers |         |
|------------------------------------------------------------------------------------------------------------------------------------------------------|------------------------------------|---------|-------------------|---------|-----------------------------------|---------|----------------------------|---------|---------------------------|---------|
|                                                                                                                                                      | Round 1                            | Round 2 | Round 1           | Round 2 | Round 1                           | Round 2 | Round 1                    | Round 2 | Round 1                   | Round 2 |
| 36_The main imaging modality for research on how primary cam morphology develops should be magnetic resonance (MR) with radial imaging (1.5T or 3 T) | .787                               | .305    | .557              | .503    | .841                              | .630    | .391                       | .266    | .290                      | .515    |
| 37_The minimum acceptable number of radial sequence magnetic                                                                                         | .749                               | .174    | .940              | .588    | .940                              | .365    | .642                       | .726    | .386                      | .817    |

|                                                                                                                                                                                                                                                                                                                                                                                                                                                                                                                             |      |      |      |      |      |      |      |      |      |      |
|-----------------------------------------------------------------------------------------------------------------------------------------------------------------------------------------------------------------------------------------------------------------------------------------------------------------------------------------------------------------------------------------------------------------------------------------------------------------------------------------------------------------------------|------|------|------|------|------|------|------|------|------|------|
| resonance (MR) imaging slices for research on how primary cam morphology develops should be 12 slices (30° intervals, in all 12 clock face positions from 12 o'clock to 11 o'clock positions)                                                                                                                                                                                                                                                                                                                               |      |      |      |      |      |      |      |      |      |      |
| 38_ Referring to precisely quantifying the asphericity of the femoral head-neck junction on radial sequence magnetic resonance (MR) imaging: use either radial sequences along the axis of the femoral neck (providing higher resolution images) or radial reconstructions from 3-dimensional acquisitions                                                                                                                                                                                                                  | .441 | .272 | .714 | .318 | .711 | .975 | .129 | .335 | .213 | .530 |
| 39_ The magnetic resonance (MR) imaging protocol for research on how primary cam morphology develops should include: (i) unilateral small field-of-view (FOV) sequences and radial images of a randomly selected or both hips, as well as (ii) femoral torsion assessment (fast axial sequences of the distal knee—femoral condyles—and proximal femoral neck), and (iii) a fluid sensitive sequence covering the whole pelvis (in axial or coronal planes, to screen for soft-tissue and bone marrow edema beyond the hip) | .546 | .394 | .508 | .877 | .513 | .671 | .186 | .484 | .896 | .451 |
| 40_ The magnetic resonance (MR) imaging for prospective research on how primary cam morphology                                                                                                                                                                                                                                                                                                                                                                                                                              | .172 | .215 | .848 | .794 | .862 | .372 | .424 | .554 | .634 | .443 |



develops should be repeated every 18 to 24 months

|                                                                                                                                                                                                                                                                                                                                                                 |      |      |      |      |      |      |      |      |      |      |
|-----------------------------------------------------------------------------------------------------------------------------------------------------------------------------------------------------------------------------------------------------------------------------------------------------------------------------------------------------------------|------|------|------|------|------|------|------|------|------|------|
| 41_In primary cam morphology epidemiological research (e.g.; when regression is being used in aetiology or prognosis research), continuous imaging outcome measures (variables), like the alpha angle, should be kept continuous                                                                                                                                | .971 | .912 | .772 | .379 | .187 | .117 | .923 | .589 | .248 | .117 |
| 42_The cam morphology magnetic resonance (MR) imaging outcome measure for research on how primary cam morphology develops (aetiology), should be the alpha angle for bone and cartilage as a continuous variable, reported for all the o'clock locations around the femoral head-neck junction, regardless of the symptomatic state of the research participant | .679 | .865 | .366 | .792 | .471 | .448 | .619 | .885 | .307 | .692 |
| 43_For research on how primary cam morphology develops it is important to quantify the epiphyseal morphology magnetic resonance (MR) imaging outcome measure using epiphyseal extension                                                                                                                                                                         | .672 | .900 | .608 | .357 | .160 | .386 | .179 | .302 | .655 | .369 |
| 44_ For research on how primary cam morphology develops the epiphyseal morphology magnetic resonance (MR) imaging outcome measure should also be quantified using epiphyseal tilt                                                                                                                                                                               | .317 | .843 | .595 | .742 | .220 | .301 | .432 | .099 | .529 | .144 |
| 45_The main imaging modality for longitudinal primary cam morphology                                                                                                                                                                                                                                                                                            | .189 | .129 | .586 | .533 | .760 | .715 | .809 | .737 | .892 | .850 |

|                                                                                                                                                                                                                                                                                                                                                                                                                                                                                                                                                                                                 |      |      |      |      |      |      |      |      |      |      |
|-------------------------------------------------------------------------------------------------------------------------------------------------------------------------------------------------------------------------------------------------------------------------------------------------------------------------------------------------------------------------------------------------------------------------------------------------------------------------------------------------------------------------------------------------------------------------------------------------|------|------|------|------|------|------|------|------|------|------|
| prognosis research should be anteroposterior (AP) pelvis and Dunn 45° view radiographs repeated at least every 5 years                                                                                                                                                                                                                                                                                                                                                                                                                                                                          |      |      |      |      |      |      |      |      |      |      |
| 46_The radiographic imaging outcome measure for research on primary cam morphology prognosis should be the alpha angle as a continuous variable reported for anteroposterior (AP) pelvis and Dunn 45° view radiographs.                                                                                                                                                                                                                                                                                                                                                                         | .588 | .474 | .455 | .179 | .540 | .185 | .501 | .414 | .632 | .414 |
| 47_In addition to reporting alpha angles as continuous in studies on aetiology or prognosis, the following quantitative and qualitative imaging outcome measures, to categorise cam morphology, can be useful in research or clinical practice: (i) Alpha angle $\geq 60^\circ$ (preferred) (ii) Head-neck offset $< 8\text{mm}$ AND head-neck offset ratio $\leq 0.15$ usually at the anterior (3 o'clock) location around the femoral head-neck junction (in addition to (i)); Osseous or cartilage convexity of the femoral head neck junction at any location (in addition to (i) and (ii)) | .681 | .723 | .330 | .170 | .197 | .370 | .153 | .211 | .054 | .019 |

**Table SF7-23** Kruskal-Wallis test to compare Radiologists vs other stakeholder groups (p-values)

| Statement | Radiologists vs Orthopaedic surgeons |         | Radiologists vs PPI |         | Radiologists vs Physical Therapists |         | Radiologists vs Physicians |         | Radiologists vs Researchers |         |
|-----------|--------------------------------------|---------|---------------------|---------|-------------------------------------|---------|----------------------------|---------|-----------------------------|---------|
|           | Round 1                              | Round 2 | Round 1             | Round 2 | Round 1                             | Round 2 | Round 1                    | Round 2 | Round 1                     | Round 2 |
|           |                                      |         |                     |         |                                     |         |                            |         |                             |         |

|                                                                                                                                                                                                                                                                                                                                                                                            |      |       |      |      |      |      |      |      |      |       |
|--------------------------------------------------------------------------------------------------------------------------------------------------------------------------------------------------------------------------------------------------------------------------------------------------------------------------------------------------------------------------------------------|------|-------|------|------|------|------|------|------|------|-------|
| 36_The main imaging modality for research on how primary cam morphology develops should be magnetic resonance (MR) with radial imaging (1.5T or 3 T)                                                                                                                                                                                                                                       | .713 | 1.000 | .652 | .447 | .522 | .319 | .391 | .266 | .733 | .724  |
| 37_The minimum acceptable number of radial sequence magnetic resonance (MR) imaging slices for research on how primary cam morphology develops should be 12 slices (30° intervals, in all 12 clock face positions from 12 o'clock to 11 o'clock positions)                                                                                                                                 | .437 | .177  | .456 | .407 | .784 | .258 | .642 | .726 | .892 | .892  |
| 38_Referring to precisely quantifying the asphericity of the femoral head-neck junction on radial sequence magnetic resonance (MR) imaging: use either radial sequences along the axis of the femoral neck (providing higher resolution images) or radial reconstructions from 3-dimensional acquisitions                                                                                  | .034 | .026  | .081 | .020 | .289 | .210 | .129 | .335 | .855 | 1.000 |
| 39_The magnetic resonance (MR) imaging protocol for research on how primary cam morphology develops should include: (i) unilateral small field-of-view (FOV) sequences and radial images of a randomly selected or both hips, as well as (ii) femoral torsion assessment (fast axial sequences of the distal knee—femoral condyles—and proximal femoral neck), and (iii) a fluid sensitive | .082 | .171  | .433 | .443 | .446 | .609 | .186 | .484 | .219 | .219  |

|                                                                                                                                                                                                                                                                                                                                                                 |      |       |       |       |      |      |      |      |      |      |
|-----------------------------------------------------------------------------------------------------------------------------------------------------------------------------------------------------------------------------------------------------------------------------------------------------------------------------------------------------------------|------|-------|-------|-------|------|------|------|------|------|------|
| sequence covering the whole pelvis (in axial or coronal planes, to screen for soft-tissue and bone marrow edema beyond the hip)                                                                                                                                                                                                                                 |      |       |       |       |      |      |      |      |      |      |
| 40_The magnetic resonance (MR) imaging for prospective research on how primary cam morphology develops should be repeated every 18 to 24 months                                                                                                                                                                                                                 | .719 | .620  | .371  | .351  | .543 | .823 | .424 | .554 | .659 | .926 |
| 41_In primary cam morphology epidemiological research (e.g.; when regression is being used in aetiology or prognosis research), continuous imaging outcome measures (variables), like the alpha angle, should be kept continuous                                                                                                                                | .809 | .900  | .675  | .622  | .177 | .181 | .923 | .589 | .208 | .170 |
| 42_The cam morphology magnetic resonance (MR) imaging outcome measure for research on how primary cam morphology develops (aetiology), should be the alpha angle for bone and cartilage as a continuous variable, reported for all the o'clock locations around the femoral head-neck junction, regardless of the symptomatic state of the research participant | .956 | 1.000 | 1.000 | 1.000 | .966 | .682 | .619 | .885 | .604 | .882 |
| 43_For research on how primary cam morphology develops it is important to quantify the epiphyseal morphology magnetic resonance (MR) imaging outcome measure using epiphyseal extension                                                                                                                                                                         | .251 | .490  | .135  | .153  | .061 | .130 | .179 | .302 | .208 | .167 |

|                                                                                                                                                                                                                                                                                                                                                                                                                                                                                                                                                                                                  |      |      |       |      |      |      |      |      |      |      |
|--------------------------------------------------------------------------------------------------------------------------------------------------------------------------------------------------------------------------------------------------------------------------------------------------------------------------------------------------------------------------------------------------------------------------------------------------------------------------------------------------------------------------------------------------------------------------------------------------|------|------|-------|------|------|------|------|------|------|------|
| 44_ For research on how primary cam morphology develops the epiphyseal morphology magnetic resonance (MR) imaging outcome measure should also be quantified using epiphyseal tilt                                                                                                                                                                                                                                                                                                                                                                                                                | .219 | .173 | .209  | .329 | .116 | .051 | .432 | .099 | .586 | .899 |
| 45_The main imaging modality for longitudinal primary cam morphology prognosis research should be anteroposterior (AP) pelvis and Dunn 45° view radiographs repeated at least every 5 years                                                                                                                                                                                                                                                                                                                                                                                                      | .150 | .150 | 1.000 | .868 | .420 | .395 | .809 | .737 | .711 | .711 |
| 46_The radiographic imaging outcome measure for research on primary cam morphology prognosis should be the alpha angle as a continuous variable reported for anteroposterior (AP) pelvis and Dunn 45° view radiographs.                                                                                                                                                                                                                                                                                                                                                                          | .093 | .102 | .707  | .869 | .525 | .735 | .501 | .414 | .415 | .572 |
| 47_ In addition to reporting alpha angles as continuous in studies on aetiology or prognosis, the following quantitative and qualitative imaging outcome measures, to categorise cam morphology, can be useful in research or clinical practice: (i) Alpha angle $\geq 60^\circ$ (preferred) (ii) Head-neck offset $< 8\text{mm}$ AND head-neck offset ratio $\leq 0.15$ usually at the anterior (3 o'clock) location around the femoral head-neck junction (in addition to (i)); Osseous or cartilage convexity of the femoral head neck junction at any location (in addition to (i) and (ii)) | .118 | .248 | .735  | .788 | .054 | .074 | .153 | .211 | .007 | .009 |

**Table SF7-24** Kruskal-Wallis test to compare Researchers vs other stakeholder groups (p-values)

| Statement                                                                                                                                                                                                                                                                                                 | Researchers vs Orthopaedic surgeons |         | Researchers vs PPI |         | Researchers vs Physical Therapists |         | Researchers vs Physicians |         | Researchers vs Radiologists |         |
|-----------------------------------------------------------------------------------------------------------------------------------------------------------------------------------------------------------------------------------------------------------------------------------------------------------|-------------------------------------|---------|--------------------|---------|------------------------------------|---------|---------------------------|---------|-----------------------------|---------|
|                                                                                                                                                                                                                                                                                                           | Round 1                             | Round 2 | Round 1            | Round 2 | Round 1                            | Round 2 | Round 1                   | Round 2 | Round 1                     | Round 2 |
| 36_The main imaging modality for research on how primary cam morphology develops should be magnetic resonance (MR) with radial imaging (1.5T or 3 T)                                                                                                                                                      | .490                                | .883    | .489               | .916    | .348                               | .672    | .290                      | .515    | .733                        | .724    |
| 37_The minimum acceptable number of radial sequence magnetic resonance (MR) imaging slices for research on how primary cam morphology develops should be 12 slices (30° intervals, in all 12 clock face positions from 12 o'clock to 11 o'clock positions)                                                | .381                                | .208    | .439               | .502    | .360                               | .364    | .386                      | .817    | .892                        | .892    |
| 38_Referring to precisely quantifying the asphericity of the femoral head-neck junction on radial sequence magnetic resonance (MR) imaging: use either radial sequences along the axis of the femoral neck (providing higher resolution images) or radial reconstructions from 3-dimensional acquisitions | .117                                | .142    | .139               | .105    | .423                               | .419    | .213                      | .530    | .855                        | 1.000   |
| 39_The magnetic resonance (MR) imaging protocol for research on how primary cam morphology develops should include: (i) unilateral small field-of-view (FOV) sequences and radial images of a randomly selected                                                                                           | .731                                | .849    | .637               | .539    | .486                               | .292    | .896                      | .451    | .219                        | .219    |

|                                                                                                                                                                                                                                                                                                                                                                 |      |      |      |      |      |      |      |      |      |      |
|-----------------------------------------------------------------------------------------------------------------------------------------------------------------------------------------------------------------------------------------------------------------------------------------------------------------------------------------------------------------|------|------|------|------|------|------|------|------|------|------|
| or both hips, as well as (ii) femoral torsion assessment (fast axial sequences of the distal knee—femoral condyles—and proximal femoral neck), and (iii) a fluid sensitive sequence covering the whole pelvis (in axial or coronal planes, to screen for soft-tissue and bone marrow edema beyond the hip)                                                      |      |      |      |      |      |      |      |      |      |      |
| 40_The magnetic resonance (MR) imaging for prospective research on how primary cam morphology develops should be repeated every 18 to 24 months                                                                                                                                                                                                                 | .434 | .780 | .801 | .545 | .752 | .968 | .634 | .443 | .659 | .926 |
| 41_In primary cam morphology epidemiological research (e.g.; when regression is being used in aetiology or prognosis research), continuous imaging outcome measures (variables), like the alpha angle, should be kept continuous                                                                                                                                | .248 | .146 | .332 | .207 | .908 | .936 | .248 | .117 | .208 | .170 |
| 42_The cam morphology magnetic resonance (MR) imaging outcome measure for research on how primary cam morphology develops (aetiology), should be the alpha angle for bone and cartilage as a continuous variable, reported for all the o'clock locations around the femoral head-neck junction, regardless of the symptomatic state of the research participant | .543 | .920 | .405 | .842 | .490 | .854 | .307 | .692 | .604 | .882 |

|                                                                                                                                                                                                                                                                                                                                                                                                |      |      |      |      |      |      |      |      |      |      |
|------------------------------------------------------------------------------------------------------------------------------------------------------------------------------------------------------------------------------------------------------------------------------------------------------------------------------------------------------------------------------------------------|------|------|------|------|------|------|------|------|------|------|
| 43_ For research on how primary cam morphology develops it is important to quantify the epiphyseal morphology magnetic resonance (MR) imaging outcome measure using epiphyseal extension                                                                                                                                                                                                       | .797 | .342 | .879 | .582 | .795 | .713 | .655 | .369 | .208 | .167 |
| 44_ For research on how primary cam morphology develops the epiphyseal morphology magnetic resonance (MR) imaging outcome measure should also be quantified using epiphyseal tilt                                                                                                                                                                                                              | .304 | .208 | .279 | .373 | .221 | .066 | .529 | .144 | .586 | .899 |
| 45_ The main imaging modality for longitudinal primary cam morphology prognosis research should be anteroposterior (AP) pelvis and Dunn 45° view radiographs repeated at least every 5 years                                                                                                                                                                                                   | .202 | .202 | .667 | .562 | .801 | .734 | .892 | .850 | .711 | .711 |
| 46_ The radiographic imaging outcome measure for research on primary cam morphology prognosis should be the alpha angle as a continuous variable reported for anteroposterior (AP) pelvis and Dunn 45° view radiographs.                                                                                                                                                                       | .216 | .173 | .636 | .566 | .833 | .701 | .632 | .414 | .415 | .572 |
| 47_ In addition to reporting alpha angles as continuous in studies on aetiology or prognosis, the following quantitative and qualitative imaging outcome measures, to categorise cam morphology, can be useful in research or clinical practice: (i) Alpha angle $\geq$ 60° (preferred) (ii) Head-neck offset < 8mm AND head-neck offset ratio $\leq$ 0.15 usually at the anterior (3 o'clock) | .150 | .102 | .041 | .031 | .584 | .066 | .054 | .019 | .007 | .009 |



location around the femoral head-neck junction (in addition to (i));  
Osseous or cartilage convexity of the femoral head neck junction at any location (in addition to (i) and (ii))

## References

- 1 Beiderbeck D, Frevel N, von der Gracht HA, *et al.* Preparing, conducting, and analyzing Delphi surveys: Cross-disciplinary practices, new directions, and advancements. *MethodsX* 2021;**8**:101401. doi:10.1016/j.mex.2021.101401
- 2 Beiderbeck D, Frevel N, von der Gracht HA, *et al.* The impact of COVID-19 on the European football ecosystem – A Delphi-based scenario analysis. *Technol Forecast Soc Change* 2021;**165**:120577. doi:10.1016/j.techfore.2021.120577
- 3 Wasserstein RL, Schirm AL, Lazar NA. Moving to a World Beyond “ $p < 0.05$ ”. *Am Stat* 2019;**73**:1–19. doi:10.1080/00031305.2019.1583913
